# Supplementary material for: A novel reaction of gem-difluorocyclopropyl ketones with nitriles leading to 2-fluoropyrroles
Source: Royal Society of Chemistry journal article supplement (doi:10.1039/c3cc45456h), 2013-01-01

## Supporting Information

### **A novel reaction of gem-difluorocyclopropyl ketones with nitriles leading to 2-fluoropyrroles**

Tang-Po Yang, Jin-Hong Lin, Qing-Yun Chen and Ji-Chang Xiao\*

*Key Laboratory of Organofluorine Chemistry, Shanghai Institute of Organic Chemistry, Chinese Academy of Science, 345 Lingling Road, Shanghai 200032, China*

E-mail: [jchxiao@sioc.ac.cn](mailto:jchxiao@sioc.ac.cn)

### **Table of Contents**

|                                                                                             |            |
|---------------------------------------------------------------------------------------------|------------|
| <b>General Methods.....</b>                                                                 | <b>S1</b>  |
| <b>General Procedure A (methenylation reactions of Aryl ketones).....</b>                   | <b>S1</b>  |
| <b>General Procedure B (The Reaction of Difluorocyclopropyl Ketones with Nitriles).....</b> | <b>S5</b>  |
| <b>NMR spectra of the new products.....</b>                                                 | <b>S12</b> |

## General Methods

All reactions were carried out under nitrogen atmosphere. All the reagents used were purchased from commercial sources and used without further purification. *m*-xylene and CH<sub>3</sub>CN were freshly distilled from CaH<sub>2</sub>. <sup>1</sup>H, <sup>13</sup>C NMR spectra were recorded in CDCl<sub>3</sub> on a spectrometer operating at 300 and 100 MHz, respectively. Chemical shifts are reported in parts per million relative to the appropriate standard: TMS for <sup>1</sup>H and <sup>13</sup>C NMR spectra. High Resolution Mass spectra were recorded on a Waters Micromass GCT instrument. The IR spectra were recorded on a Shimadzu IR-440 spectrometer. Column chromatography was carried out on silica gel (300-400 mm).

## General Procedure A (methenylation reactions of Aryl ketones)

Into an oven dried Schlenk tube was weighed aryl vinyl ketones (20 mmol), anhydrous sodium fluoride (2 mmol). *m*-xylene (1 mL) were added to the mixture under the atmosphere of nitrogen. The mixture was heated to 110°C and stirred for 5 min. Then, TFDA (FSO<sub>2</sub>CF<sub>2</sub>CO<sub>2</sub>SiMe<sub>3</sub>, 40 mmol) was added dropwise in 30 min. Then the mixture was stirred for further 30 min at 110°C after addition of TFDA. When the substrate was completely transformed via TLC, the mixture was cooled to room temperature. After removal of the solvent under reduced pressure the crude product was purified by column chromatography (Hexane : Et<sub>2</sub>O = 20 : 1).

### Phenyl 2,2-Difluorocyclopropyl Ketone

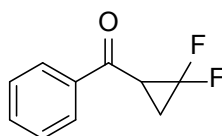

1a

Colorless liquid (77%). <sup>1</sup>H NMR (300 MHz, CDCl<sub>3</sub>): δ 8.01 (d, *J* = 7.3 Hz, 2 H), 7.63 (t, *J* = 7.3 Hz, 1 H), 7.52 (t, *J* = 7.3 Hz, 2 H), 3.39 (m, 1 H), 2.43 (m, 1 H), 1.81 (m, 1 H) ppm; <sup>19</sup>F NMR (282 MHz, CDCl<sub>3</sub>): δ: -124.16 (dtd, *J* = 149.0, 13.0, 6.0 Hz, 1 F), -140.04 (ddd, *J* = 149.0, 12.2, 4.8 Hz, 1 F) ppm;

### 4-methylphenyl 2,2-Difluorocyclopropyl Ketone

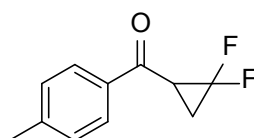

1b

White solid (38%)  $^1\text{H}$  NMR (300 MHz,  $\text{CDCl}_3$ ):  $\delta$  7.91 (d,  $J = 8.0$  Hz, 2 H), 7.31 (d,  $J = 8.1$  Hz, 2 H), 3.37 (m, 1 H), 2.41 (m, 1 H), 2.44 (s, 3 H), 1.78 (m, 1 H) ppm;  $^{19}\text{F}$  NMR (282 MHz,  $\text{CDCl}_3$ ):  $\delta = -124.18$  (dtd,  $J = 149.0, 12.4, 5.9$  Hz 1 F),  $-140.13$  (ddd,  $J = 148.7, 12.1, 4.7$  Hz, 1 F) ppm

#### 4-methoxyphenyl 2,2-Difluorocyclopropyl Ketone

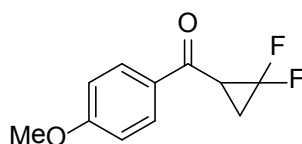

1c

Faint yellow liquid (41%)  $^1\text{H}$  NMR (300 MHz,  $\text{CDCl}_3$ ):  $\delta$  8.00 (d,  $J = 8.7$  Hz, 2 H), 6.98 (d,  $J = 8.7$  Hz, 2 H), 3.89 (s, 3 H), 3.34 (m, 1 H), 2.40 (m, 1 H), 1.77 (m, 1 H) ppm;  $^{19}\text{F}$  NMR (282 MHz,  $\text{CDCl}_3$ ):  $\delta = -124.39$  (dtd,  $J = 149.0, 13.0, 5.8$  Hz, 1 F),  $-140.35$  (ddd,  $J = 149.0, 12.2, 4.6$  Hz, 1 F) ppm

#### 4-Chlorophenyl 2,2-Difluorocyclopropyl Ketone

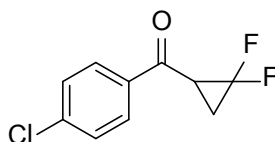

1d

Faint yellow solid (22%)  $^1\text{H}$  NMR (300 MHz,  $\text{CDCl}_3$ ):  $\delta$  7.95 (d,  $J = 8.4$  Hz, 2 H), 7.49 (d,  $J = 8.4$  Hz, 2 H), 3.34 (m, 1 H), 2.43 (m, 1 H), 1.82 (m, 1 H) ppm;  $^{19}\text{F}$  NMR (282 MHz,  $\text{CDCl}_3$ ):  $\delta -124.07$  (dtd,  $J = 148.7, 12.3, 5.7$  Hz, 1 F),  $-139.90$  (ddd,  $J = 148.7, 12.2, 4.9$  Hz, 1 F) ppm;

#### 4-Bromophenyl 2,2-Difluorocyclopropyl Ketone

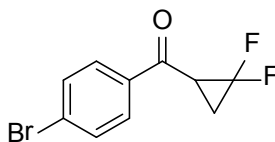

1e

White solid (m.p. 67-69°C, 32%)  $^1\text{H}$  NMR (300 MHz,  $\text{CDCl}_3$ ):  $\delta$  7.87 (d,  $J = 8.8$  Hz, 2 H), 7.66 (d,  $J = 8.8$  Hz, 2 H), 3.35 (m, 1 H), 2.43 (m, 1 H), 1.84 (m, 1 H) ppm;  $^{19}\text{F}$

NMR (282 MHz, CDCl<sub>3</sub>):  $\delta$  -124.56 (dtd,  $J$  = 148.3, 12.3, 5.9 Hz, 1 F), -140.36 (ddd,  $J$  = 148.3, 12.1, 4.7 Hz, 1 F) ppm; <sup>13</sup>C NMR (CDCl<sub>3</sub>, 100 MHz):  $\delta$  189.5, 135.7, 132.3, 129.9, 129.1, 111.5 (t,  $J$  = 287.6 Hz), 29.7 (dd,  $J$  = 11.7, 9.6 Hz), 15.8 (dd,  $J$  = 11.0, 8.8 Hz) ppm; EI-MS (m/z, %): 183 (100), 185 (92.6), 76 (54.0), 155 (50.2), 157 (49.6), 75 (47.3), 50 (44.1), 133 (39.2). IR (KBr): 3117, 3095, 3075, 3060, 1671, 1582, 1453, 1400, 1381, 1319, 1247, 1180, 1008, 846, 703, 658, 515, 479cm<sup>-1</sup>.

HRMS for C<sub>10</sub>H<sub>7</sub>OF<sub>2</sub>Br: 259.9648; Found: 259.9649.

#### 4-fluorophenyl 2,2-Difluorocyclopropyl Ketone

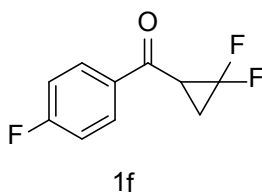

Colorless liquid (28%) <sup>1</sup>H NMR (300 MHz, CDCl<sub>3</sub>):  $\delta$  8.08-8.02 (m, 2 H), 7.23-7.16 (m, 2 H), 3.35 (m, 1 H), 2.43 (m, 1 H), 1.82 (m, 1 H) ppm; <sup>19</sup>F NMR (282 MHz, CDCl<sub>3</sub>):  $\delta$  -103.89 (m, 1 F), -124.28 (dtd,  $J$  = 148.5, 12.7, 5.9 Hz, 1 F), -140.07 (ddm,  $J$  = 149.2, 12.0 Hz, 1 F) ppm

#### 4-nitrophenyl 2,2-Difluorocyclopropyl Ketone

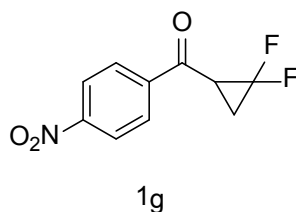

White solid (m.p. 62-64°C, 44%) <sup>1</sup>H NMR (300 MHz, CDCl<sub>3</sub>):  $\delta$  8.38 (d,  $J$  = 8.5 Hz, 2 H), 8.18 (d,  $J$  = 8.5 Hz, 2 H), 3.44 (m, 1 H), 2.50 (m, 1 H), 1.94 (m, 1 H) ppm; <sup>19</sup>F NMR (282 MHz, CDCl<sub>3</sub>):  $\delta$  = -123.66 (dtd,  $J$  = 148.1, 12.2, 6.0 Hz, 1 F), -139.32 (ddd,  $J$  = 148.1, 12.0, 4.7 Hz, 1 F) ppm; <sup>13</sup>C NMR (100 MHz, CDCl<sub>3</sub>):  $\delta$  189.3, 150.7, 141.3, 129.4, 124.1, 123.8, 111.4 (t,  $J$  = 288.5 Hz), 30.2 (dd,  $J$  = 11.8, 10.3 Hz), 16.3 (dd,  $J$  = 11.4, 9.1 Hz) ppm; EI-MS (m/z, %): 150 (100), 104 (58.4), 76 (54.2), 133 (41.3), 50 (37.8), 51 (26.3), 75 (25.6), 77 (25.5). IR (KBr): 3113, 3087, 3052, 1677, 1607, 1451, 1413, 1321, 1298, 1208, 1052, 963, 923, 856, 729, 703, 685, 479cm<sup>-1</sup>.  
HRMS for C<sub>10</sub>H<sub>7</sub>NO<sub>3</sub>F<sub>2</sub>: 227.0394; Found: 227.0397

### 3-methoxyphenyl 2,2-Difluorocyclopropyl Ketone

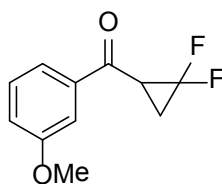

1h

Colorless liquid (71%)  $^1\text{H}$  NMR (300 MHz,  $\text{CDCl}_3$ ):  $\delta$  7.60 (d,  $J = 7.9$  Hz, 1 H), 7.52 (s, 1 H), 7.43 (t,  $J = 7.9$  Hz, 1 H), 7.17 (dd,  $J = 7.9, 2.6$  Hz, 1 H), 3.87 (s, 3 H), 3.38 (m, 1 H), 2.43 (m, 1 H), 1.81 (m, 1 H) ppm;  $^{19}\text{F}$  NMR (282 MHz,  $\text{CDCl}_3$ ):  $\delta = -124.73$  (dm,  $J = 148.0$  Hz, 1 F),  $-140.65$  (dm,  $J = 148.0$  Hz, 1 F) ppm

### 3-Bromophenyl 2,2-Difluorocyclopropyl Ketone

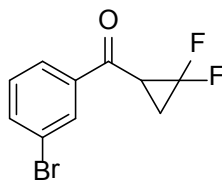

1i

White solid (62%)  $^1\text{H}$  NMR (300 MHz,  $\text{CDCl}_3$ ):  $\delta$  8.12 (s, 1 H), 7.93 (d,  $J = 7.9$  Hz, 1 H), 7.75 (d,  $J = 7.9$  Hz, 1 H), 7.41 (t,  $J = 7.9$  Hz, 1 H), 3.37 (m, 1 H), 2.44 (m, 1 H), 1.85 (m, 1 H) ppm;  $^{19}\text{F}$  NMR (282 MHz,  $\text{CDCl}_3$ ):  $\delta = -124.48$  (dtd,  $J = 148.5, 12.2, 6.0$  Hz, 1 F),  $-140.28$  (ddd,  $J = 148.5, 12.1, 4.8$  Hz, 1 F) ppm;  $^{13}\text{C}$  NMR (100 MHz,  $\text{CDCl}_3$ ):  $\delta$  189.3, 138.7, 136.6, 131.4, 130.4, 127.0, 123.2, 111.5 (dd,  $J = 288.4, 286.9$  Hz), 29.8 (dd,  $J = 11.7, 10.3$  Hz), 15.9 (dd,  $J = 11.0, 8.8$  Hz) ppm; EI-MS ( $m/z$ , %): 183 (100), 185 (99), 155 (48.6), 157 (47.7), 133 (28.6), 76 (28.0), 181 (26.6), 75 (22.9). IR (KBr): 3116, 3062, 3026, 1669, 1566, 1459, 1374, 1316, 1247, 1203, 1055, 1008, 929, 919, 908, 817, 773, 704, 679, 667, 478  $\text{cm}^{-1}$ . HRMS for  $\text{C}_{10}\text{H}_7\text{OF}_2\text{Br}$ : 259.9648; Found: 259.9651.

### 3-Chlorophenyl 2,2-Difluorocyclopropyl Ketone

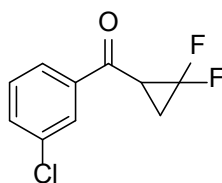

1j

White solid (70%)  $^1\text{H}$  NMR (300 MHz,  $\text{CDCl}_3$ ):  $\delta$  7.97 (t,  $J = 1.8$  Hz, 1 H), 7.89 (dt,  $J = 7.9, 1.8$  Hz, 1 H), 7.60 (ddd,  $J = 7.9, 1.8, 1.1$  Hz, 1H), 7.47 (t,  $J = 7.9$  Hz, 1 H), 3.36 (m, 1 H), 2.45 (m, 1 H), 1.84 (m, 1 H) ppm;  $^{19}\text{F}$  NMR (282 MHz,  $\text{CDCl}_3$ ):  $\delta = -124.52$  (dm,  $J = 148.1$  Hz, 1 F),  $-140.36$  (dm,  $J = 148.1$  Hz, 1 F) ppm

### Naphthalen-2-yl 2,2-difluorocyclopropyl ketone

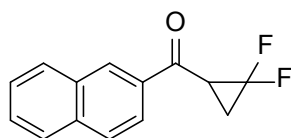

1k

White solid (m.p. 91-93 °C, 57%)  $^1\text{H}$  NMR (300 MHz,  $\text{CDCl}_3$ ):  $\delta$  8.52 (s, 1 H), 8.07-7.98 (m, 2 H), 7.91 (t,  $J = 8.8$  Hz, 2 H), 7.65-7.55 (m, 2 H), 3.56 (m, 1 H), 2.49 (m, 1 H), 1.86 (m, 1 H) ppm;  $^{19}\text{F}$  NMR (282 MHz,  $\text{CDCl}_3$ ):  $\delta -124.51$  (dtd,  $J = 147.9, 12.5, 5.9$  Hz, 1 F),  $-140.43$  (ddd,  $J = 147.9, 12.3, 5.1$  Hz, 1 F) ppm;  $^{13}\text{C}$  NMR (100 MHz,  $\text{CDCl}_3$ ):  $\delta$  190.4, 135.9, 134.5, 132.5, 130.5, 129.7, 128.9, 128.8, 127.9, 127.1, 123.8, 111.7 (dd,  $J = 288.1, 286.6$  Hz), 29.84 (dd,  $J = 11.8, 9.6$  Hz), 15.76 (dd,  $J = 11.0, 9.0$  Hz) ppm; EI-MS (m/z, %): 127 (100), 155 (75.2), 232 (46.3), 128 (24.8), 126 (24.1), 183 (21.0), 77 (18.6), 51 (14.4). IR (KBr): 3113, 3053, 3021, 1676, 1624, 1453, 1373, 1237, 1061, 1043, 1008, 925, 768, 744, 690, 484,  $478\text{cm}^{-1}$ . HRMS for  $\text{C}_{14}\text{H}_{10}\text{OF}_2$ : 232.0700; Found: 232.0702.

### General Procedure B (The Reaction of Difluorocyclopropyl Ketones with Nitriles)

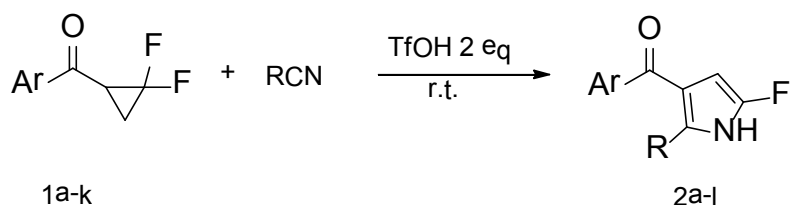

Under nitrogen, aryl difluorocyclopropyl ketones (0.2 mmol), triflic acid (0.4 mmol) was added into acetonitrile (1 mL). And the mixture was stirred for 0.5 h at room temperature. When TLC showed the complete transformation of the substrate, the mixture

was quenched at  $-20^{\circ}\text{C}$  with triethylamine carefully. After removal of the solvent under reduced pressure the crude product was purified by column chromatography (Hexane : EtOAc = 8 : 1).

**(5-fluoro-2-methyl-1H-pyrrol-3-yl) (phenyl) methanone**

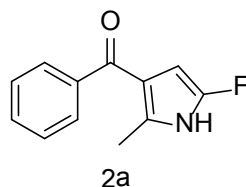

White solid (m.p.  $120\text{-}122^{\circ}\text{C}$ , 64 %)  $^1\text{H}$  NMR (300 MHz,  $\text{CDCl}_3$ ):  $\delta$  8.61 (br, 1 H), 7.77 (d,  $J = 7.0$  Hz, 2 H), 7.52 (t,  $J = 7.0$  Hz, 1 H), 7.44 (t,  $J = 7.0$  Hz, 2 H), 5.68 (t,  $J = 3.2$  Hz, 1 H), 2.47 (s, 3 H) ppm;  $^{19}\text{F}$  NMR (282 MHz,  $\text{CDCl}_3$ ):  $\delta$  -141.02 (s, 1 F) ppm;  $^{13}\text{C}$  NMR (100 MHz,  $\text{CDCl}_3$ )  $\delta$  192.7 (d,  $J = 15.4$  Hz), 145.1 (dd,  $J = 260.1, 5.9$  Hz), 140.1, 131.5, 128.9, 128.6 (d,  $J = 14.7$  Hz), 128.2, 117.2 (t,  $J = 3.6$  Hz), 87.64 (d,  $J = 8.8$  Hz), 13.3 ppm; EI-MS (m/z, %): 203 (100), 202 (85.3), 126 (78.1), 182 (42.1), 77 (38.1), 51 (32.3), 57 (27.0), 71 (18.2). IR (KBr): 3211, 1625, 1600, 1574, 1530, 1448, 1430, 1371, 1252, 762, 721, 694, 675, 606  $\text{cm}^{-1}$ . HRMS for  $\text{C}_{12}\text{H}_{10}\text{NOF}$ : 203.0746; Found: 203.0749.

**(5-fluoro-2-methyl-1H-pyrrol-3-yl)(p-tolyl) methanone**

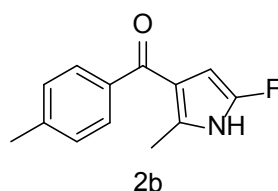

White solid (m.p.  $149\text{-}151^{\circ}\text{C}$ , 49 %)  $^1\text{H}$  NMR (400 MHz,  $\text{CDCl}_3$ ):  $\delta$  8.99 (br, 1 H), 7.68 (d,  $J = 7.8$  Hz, 2 H), 7.23 (d,  $J = 7.8$  Hz, 2 H), 5.67 (s, 1 H), 2.43 (s, 3 H), 2.41 (s, 3 H) ppm;  $^{19}\text{F}$  NMR (282 MHz,  $\text{CDCl}_3$ ):  $\delta$  -140.87 (s, 1 F) ppm;  $^{13}\text{C}$  NMR (100 MHz,  $\text{CDCl}_3$ ):  $\delta$  192.3 (d,  $J = 2.9$  Hz), 145.0 (d,  $J = 260.0$  Hz), 142.1, 137.4, 129.2, 128.8, 128.0, 117.4 (d,  $J = 2.9$  Hz), 87.6 (d,  $J = 8.8$  Hz), 21.6, 13.2 ppm; EI-MS (m/z, %): 217 (100), 202 (83.7), 216 (60.0), 126 (55.3), 196 (36.9), 91 (26.7), 182 (19.1), 218 (15.6). IR (KBr): 3176, 1633, 1533, 1427, 1371, 1178, 911, 836, 795, 755, 605. HRMS for  $\text{C}_{13}\text{H}_{12}\text{NOF}$ : 217.0903; Found: 217.0901.

**(5-fluoro-2-methyl-1H-pyrrol-3-yl) (4-methoxyphenyl) methanone**

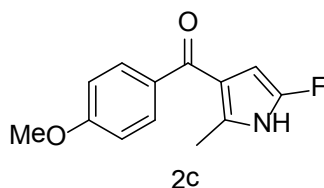

White solid (m.p. 126-128 °C, 54 %) <sup>1</sup>H NMR (300 MHz, CDCl<sub>3</sub>): δ 8.98 (br, 1 H), 7.81 (d, *J* = 8.7 Hz, 2 H), 6.94 (d, *J* = 8.7 Hz, 2 H), 5.68 (s, 1 H), 3.87 (s, 3 H), 2.44 (s, 3 H) ppm; <sup>19</sup>F NMR (282 MHz, CDCl<sub>3</sub>): δ -141.05 (s, 1 F) ppm; <sup>13</sup>C NMR (100 MHz, CDCl<sub>3</sub>): δ 191.4 (d, *J* = 3.0 Hz), 162.5, 145.0 (d, *J* = 259.9 Hz), 132.6, 131.4, 127.7 (d, *J* = 1.5 Hz), 117.4 (d, *J* = 2.9 Hz), 113.4, 87.5 (d, *J* = 8.8 Hz), 55.4, 13.1 ppm; EI-MS (m/z, %): 233 (100), 232 (65.9), 126 (57.5), 202 (39.1), 135 (31.4), 212 (27.0), 77 (19.4), 92 (15.9). IR (KBr): 3207, 1623, 1537, 1433, 1371, 1249, 1170, 1032, 915, 834, 761, 619 cm<sup>-1</sup>. HRMS for C<sub>13</sub>H<sub>12</sub>NO<sub>2</sub>F: 233.0852; Found: 233.0854.

**(4-chlorophenyl) (5-fluoro-2-methyl-1H-pyrrol-3-yl) methanone**

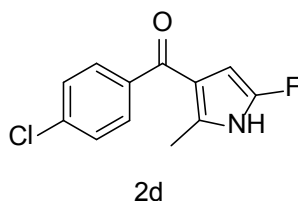

White solid (m.p. 138-140 °C, 57 %) <sup>1</sup>H NMR (300 MHz, CDCl<sub>3</sub>): δ 8.40 (br, 1 H), 7.72 (d, *J* = 8.5 Hz, 2 H), 7.42 (d, *J* = 8.5 Hz, 2 H), 5.65 (t, *J* = 3.1 Hz, 1 H), 2.48 (s, 3 H) ppm; <sup>19</sup>F NMR (282 MHz, CDCl<sub>3</sub>): δ = -140.91 (s, 1 F) ppm; <sup>13</sup>C NMR (100 MHz, CD<sub>3</sub>COCD<sub>3</sub>): δ 189.3 (d, *J* = 3.7 Hz), 145.4 (d, *J* = 255.8 Hz), 139.2, 136.6, 130.3, 128.4, 128.3, 116.5 (d, *J* = 3.0 Hz), 86.6 (d, *J* = 9.5 Hz), 12.2 ppm; EI-MS (m/z, %): 126 (100), 237 (81.0), 202 (67.4), 201 (53.8), 236 (46.9), 238 (32.2), 111 (31.0), 182 (26.9). IR (KBr): 3251, 1629, 1587, 1530, 1433, 1371, 1253, 1091, 1015, 914, 844, 765, 764, 606 cm<sup>-1</sup>. HRMS for C<sub>12</sub>H<sub>9</sub>NOFCl: 237.0357; Found: 237.0357.

**(4-bromophenyl) (5-fluoro-2-methyl-1H-pyrrol-3-yl) methanone**



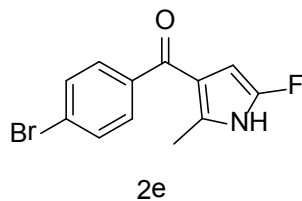

White solid (m.p. 141-143 °C, 65 %)  $^1\text{H}$  NMR (300 MHz,  $\text{CD}_3\text{Cl}_3$ ):  $\delta$  8.22 (br, 1 H), 7.65 (d,  $J = 8.4$  Hz, 2 H), 7.58 (d,  $J = 8.4$  Hz, 2 H) 5.65 (t,  $J = 2.8$  Hz, 1 H), 2.49 (s, 3 H) ppm;  $^{19}\text{F}$  NMR (282 MHz,  $\text{CD}_3\text{COCD}_3$ ):  $\delta$  -143.11 (s, 1 F) ppm;  $^{13}\text{C}$  NMR (100 MHz,  $\text{CD}_3\text{COCD}_3$ ):  $\delta$  189.4 (d,  $J = 2.9$  Hz), 145.4 (d,  $J = 256.3$  Hz), 139.6, 131.3, 130.5, 128.4, 125.1, 116.5 (d,  $J = 2.9$  Hz), 86.6 (d,  $J = 9.5$  Hz), 12.2 ppm; EI-MS (m/z, %): 126 (100), 201 (54.8), 202 (53.2), 283 (51.7), 281 (49.4), 282 (31.8), 182 (28.3), 280 (25.5). HRMS for  $\text{C}_{12}\text{H}_9\text{NOFBr}$ : 280.9852; Found: 280.9849.

**(5-fluoro-2-methyl-1H-pyrrol-3-yl) (4-fluorophenyl) methanone**

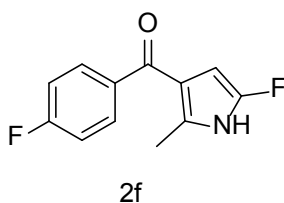

White solid (m.p. 144-145 °C, 60 %)  $^1\text{H}$  NMR (300 MHz,  $\text{CD}_3\text{COCD}_3$ ):  $\delta$  11.03 (br, 1 H), 7.83 (dd,  $J = 8.6, 5.6$  Hz, 2 H), 7.25 (t,  $J = 8.6$  Hz, 2 H), 5.68 (d,  $J = 2.6$  Hz, 1 H), 2.43 (s, 3 H) ppm;  $^{19}\text{F}$  NMR (282 MHz,  $\text{CD}_3\text{COCD}_3$ ):  $\delta = -110.97$  (m, 1 F), -144.10 (s, 1F) ppm;  $^{13}\text{C}$  NMR (100 MHz,  $\text{CD}_3\text{COCD}_3$ )  $\delta$  189.1 (d,  $J = 2.9$  Hz), 164.5 (d,  $J = 249.1$  Hz), 145.3 (d,  $J = 255.6$  Hz), 137.0 (d,  $J = 2.9$  Hz), 131.2 (d,  $J = 9.5$  Hz), 128.1, 116.6, 114.9 (d,  $J = 21.9$  Hz), 86.6 (d,  $J = 9.5$  Hz), 12.2 ppm; EI-MS (m/z, %): 221 (100), 126 (78.0), 220 (59.4), 200 (31.4), 95 (27.4), 123 (19.6), 98 (15.0), 222 (14.3). IR (KBr): 3187, 1625, 1529, 1429, 1257, 1244, 848, 757  $\text{cm}^{-1}$ . HRMS for  $\text{C}_{12}\text{H}_9\text{NOF}_2$ : 221.0652; Found: 221.0648

**(5-fluoro-2-methyl-1H-pyrrol-3-yl) (4-nitrophenyl) methanone**

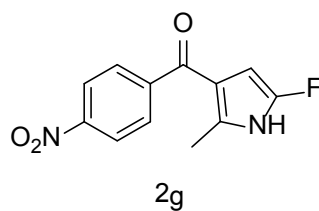

White solid (m.p. 193-195 °C, 61 %)  $^1\text{H}$  NMR (400 MHz,  $\text{CD}_3\text{COCD}_3$ ):  $\delta$  = 11.10 (br, 1 H), 8.34 (d,  $J$  = 8.8 Hz, 2 H), 7.94 (d,  $J$  = 8.8 Hz, 2 H), 5.67 (d,  $J$  = 3.5 Hz, 1 H), 2.45 (s, 3 H) ppm;  $^{19}\text{F}$  NMR (282 MHz,  $\text{CD}_3\text{COCD}_3$ ):  $\delta$  = -141.79 (s, 1 F) ppm;  $^{13}\text{C}$  NMR (100 MHz,  $\text{CD}_3\text{COCD}_3$ ):  $\delta$  188.9 (d,  $J$  = 2.9 Hz), 149.2, 146.0, 145.5 (d,  $J$  = 257.0 Hz), 129.5, 129.4, 123.4, 116.2 (d,  $J$  = 3.7 Hz), 86.6 (d,  $J$  = 10.2 Hz), 12.4 ppm; EI-MS (m/z, %): 126 (100), 248 (61.0), 201 (51.6), 231 (30.8), 247 (21.7), 172 (16.1), 98 (16.0), 71 (15.1). IR (KBr): 3284, 1637, 1515, 1426, 1349, 1244, 868, 852, 771, 728  $\text{cm}^{-1}$ . HRMS for  $\text{C}_{12}\text{H}_9\text{N}_2\text{O}_3\text{F}$ : 248.0597; Found: 248.0595.

**(5-fluoro-2-methyl-1H-pyrrol-3-yl) (3-methoxyphenyl) methanone**

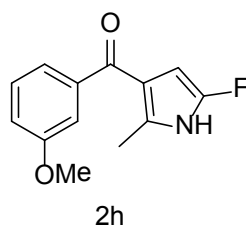

White solid (m.p. 130-132 °C, 74 %)  $^1\text{H}$  NMR (300 MHz,  $\text{CDCl}_3$ ):  $\delta$  9.48 (br, 1H), 7.28-7.22 (m, 3 H), 7.01-6.97 (m, 1 H), 5.61 (t,  $J$  = 2.9 Hz, 1 H), 3.77 (s, 3 H), 2.37 (s, 3 H) ppm;  $^{19}\text{F}$  NMR (282 MHz,  $\text{CDCl}_3$ ):  $\delta$  -140.79 (s, 1 F) ppm;  $^{13}\text{C}$  NMR (100 MHz,  $\text{CDCl}_3$ ):  $\delta$  192.4 (d,  $J$  = 2.6 Hz), 159.5, 145.1 (d,  $J$  = 260.2 Hz), 141.5, 129.2, 128.7, 121.6, 117.8, 117.2, 113.6, 87.6 (d,  $J$  = 8.8 Hz), 55.4, 13.3 ppm; EI-MS (m/z, %): 233 (100), 126 (94.2), 232 (58.9), 212 (22.6), 202 (20.1), 71 (18.6), 77 (18.0), 97 (16.2). IR (KBr): 3242, 1625, 1582, 1484, 1432, 1372, 1267, 1045, 864, 818, 753  $\text{cm}^{-1}$ . HRMS for  $\text{C}_{13}\text{H}_{12}\text{NO}_2\text{F}$ : 233.0852; Found: 233.0853.

**(3-bromophenyl) (5-fluoro-2-methyl-1H-pyrrol-3-yl) methanone**

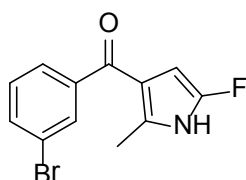

2i

White solid (m.p. 191-193 °C, 79 %)  $^1\text{H}$  NMR (400 MHz,  $\text{CD}_3\text{COCD}_3$ ):  $\delta$  11.02 (br, 1 H), 7.87 (s, 1 H), 7.75 (d,  $J = 7.8$  Hz, 2 H), 7.48 (t,  $J = 7.8$  Hz, 1 H), 5.69 (d,  $J = 3.1$  Hz, 1 H), 2.46 (s, 3 H) ppm;  $^{19}\text{F}$  NMR (282 MHz,  $\text{CD}_3\text{COCD}_3$ ):  $\delta$  -143.85 (s, 1 F) ppm;  $^{13}\text{C}$  NMR (100 MHz,  $\text{CD}_3\text{COCD}_3$ )  $\delta$  188.9 (d,  $J = 3.0$  Hz), 145.4 (d,  $J = 257.2$  Hz), 142.7, 133.8, 131.2, 130.2, 128.7, 127.4, 121.8, 116.3 (d,  $J = 3.7$  Hz), 86.6 (d,  $J = 9.5$  Hz), 12.2 ppm; EI-MS (m/z, %): 126 (100), 201 (39.1), 281 (38.7), 283 (38.3), 282 (27.5), 280 (23.2), 202 (19.0), 182 (17.0). IR (KBr): 3180, 1623, 1561, 1530, 1247, 793, 709, 686  $\text{cm}^{-1}$ . HRMS for  $\text{C}_{12}\text{H}_9\text{NOBrF}$ : 280.9852; Found: 280.9855.

**(3-chlorophenyl)(5-fluoro-2-methyl-1H-pyrrol-3-yl)methanone**

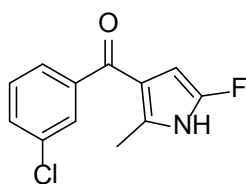

2j

White solid (m.p. 197-200 °C, 66 %)  $^1\text{H}$  NMR (300 MHz,  $\text{CD}_3\text{COCD}_3$ ):  $\delta$  11.13 (br, 1 H), 7.69-7.67 (m, 2 H), 7.58-7.52 (m, 2 H), 5.68 (d,  $J = 2.6$  Hz), 2.43 (s, 3 H) ppm;  $^{19}\text{F}$  NMR (282 MHz,  $\text{CD}_3\text{COCD}_3$ ):  $\delta$  -143.00 (s, 1 F) ppm;  $^{13}\text{C}$  NMR (100 MHz,  $\text{CD}_3\text{COCD}_3$ )  $\delta$  189.0 (d,  $J = 3.2$  Hz), 145.4 (d,  $J = 257.1$  Hz), 142.5, 133.8, 130.8, 130.0, 128.7, 128.2, 127.0, 116.4 (d,  $J = 3.2$  Hz), 86.6 (d,  $J = 9.6$  Hz), 11.8 ppm; EI-MS (m/z, %): 126 (100), 237 (63.8), 236 (39.2), 201 (29.4), 239 (22.8), 238 (22.1), 200(19.6), 111 (16.4). IR (KBr): 3177, 1622, 1530, 1249, 756, 724, 686  $\text{cm}^{-1}$ . HRMS for  $\text{C}_{12}\text{H}_9\text{NOClF}$ : 237.0357; Found: 237.0360

**(5-fluoro-2-methyl-1H-pyrrol-3-yl)(naphthalen-2-yl)methanone**

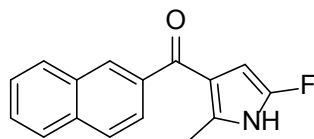

2k

White solid (m.p. 202-204 °C, 52 %)  $^1\text{H}$  NMR (300 MHz,  $\text{CDCl}_3$ ):  $\delta$  8.28 (s, 1 H), 8.13 (br, 1 H), 7.95-7.89 (m, 4 H), 7.60-7.52 (m, 2 H), 5.76 (m, 1 H), 2.51 (s, 3 H) ppm;  $^{19}\text{F}$  NMR (282 MHz,  $\text{CDCl}_3$ ):  $\delta$  -140.42 (s, 1 F) ppm;  $^{13}\text{C}$  NMR (100 MHz,  $\text{CD}_3\text{COCD}_3$ ):  $\delta$  190.5 (d,  $J = 2.8$  Hz), 145.3 (d,  $J = 256.4$  Hz), 137.8, 134.7, 132.6, 129.3, 129.1, 127.9, 127.9, 127.7, 127.6, 126.6, 125.3, 117.0 (d,  $J = 3.1$  Hz), 86.8 (d,  $J = 9.2$  Hz), 12.2 ppm; EI-MS (m/z, %): 254 (100), 253 (64.0), 126 (54.9), 44 (48.7), 127 (34.0), 237 (26.7), 234 (20.5), 232 (20.1). IR (KBr): 3197, 1622, 1528, 1429, 1377, 1255, 907, 780, 751, 608, 479  $\text{cm}^{-1}$ . HRMS for  $\text{C}_{16}\text{H}_{12}\text{NOF}$ : 253.0903; Found: 253.0908.

**(5-fluoro-2-phenyl-1H-pyrrol-3-yl) (phenyl) methanone**

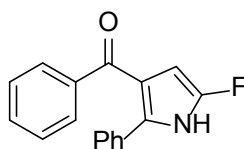

2L

White solid (m.p. 166-169 °C, 45 %)  $^1\text{H}$  NMR (300 MHz,  $\text{CDCl}_3$ ):  $\delta$ : 8.81 (br, 1H), 7.71 (d,  $J = 7.2$  Hz, 2 H), 7.39 (t,  $J = 7.2$  Hz, 1 H), 7.31-7.25 (m, 4 H), 7.19-7.18 (m, 3H), 5.87 (t,  $J = 3.0$  Hz, 1H);  $^{19}\text{F}$  NMR (282 MHz,  $\text{CDCl}_3$ ):  $\delta$  -138.8 (s, 1 F) ppm;  $^{13}\text{C}$  NMR (100 MHz,  $\text{CDCl}_3$ ):  $\delta$  192.3 (d,  $J = 2.2$  Hz), 146.9 (d,  $J = 262.6$  Hz), 139.0, 131.8, 131.2, 129.6, 128.8, 128.5, 128.4, 128.1, 128.0, 118.2 (d,  $J = 2.2$  Hz), 89.42 (d,  $J = 9.5$  Hz); EI-MS (m/z, %): 265 (100), 188 (94.9), 264 (57.2), 77 (29.4), 133 (23.9), 266 (17.4), 105 (14.4), 189 (14.0); IR (KBr): 3162, 3025, 1609, 1594, 1574, 1528, 1485, 1452, 1428, 1340, 1286, 1271, 1232, 1159, 1123, 911, 901, 802, 772, 733, 693, 672, 648  $\text{cm}^{-1}$ ; HRMS for  $\text{C}_{17}\text{H}_{12}\text{NOF}$ : 265.0903; Found: 265.0905;

## NMR spectra of the new products

### $^1\text{H}$ NMR of **1e**

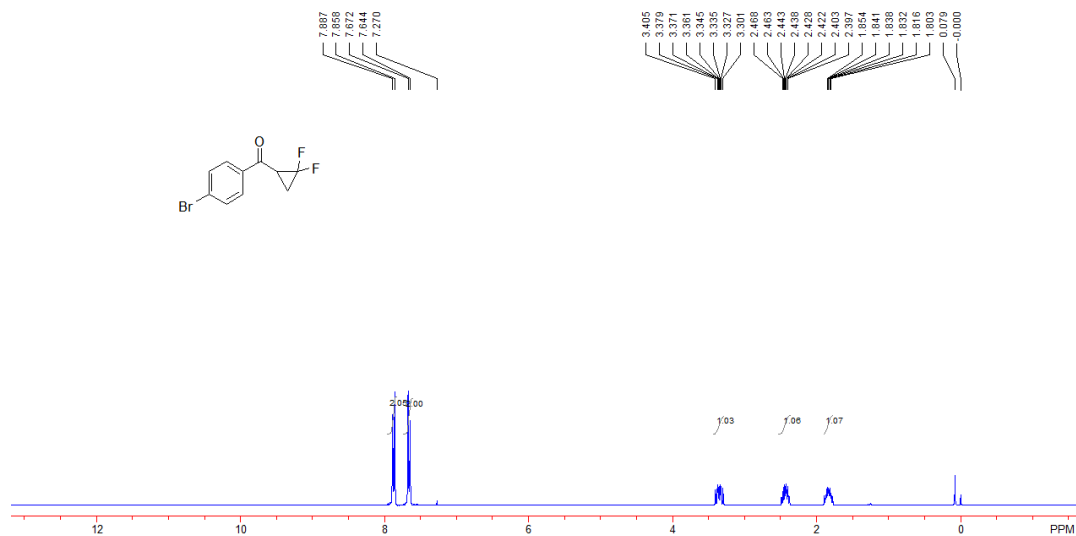

### $^{19}\text{F}$ NMR of **1e**

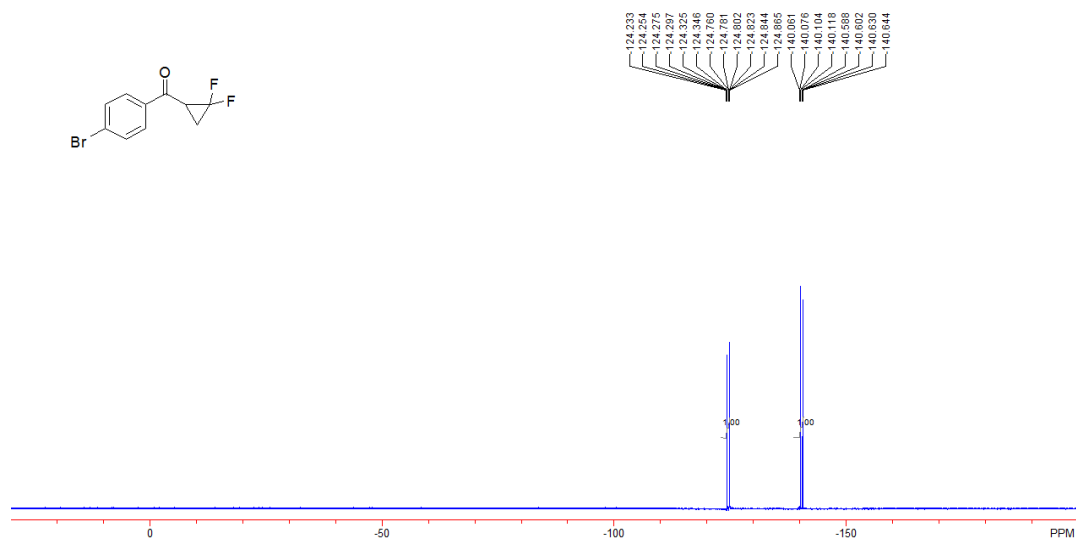

### $^{13}\text{C}$ NMR of **1e**

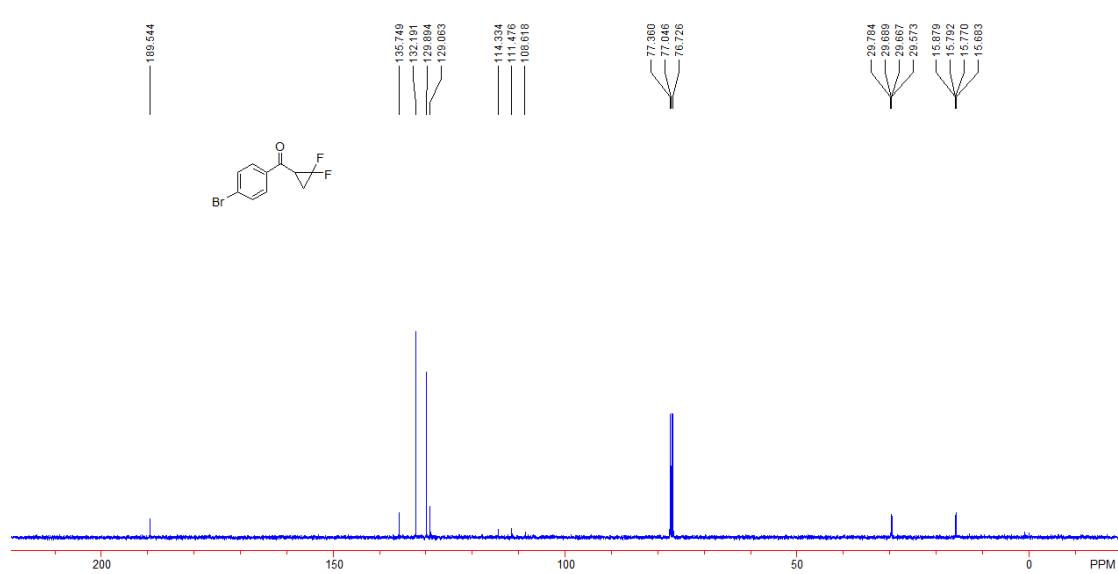

### $^1\text{H}$ NMR of **1g**

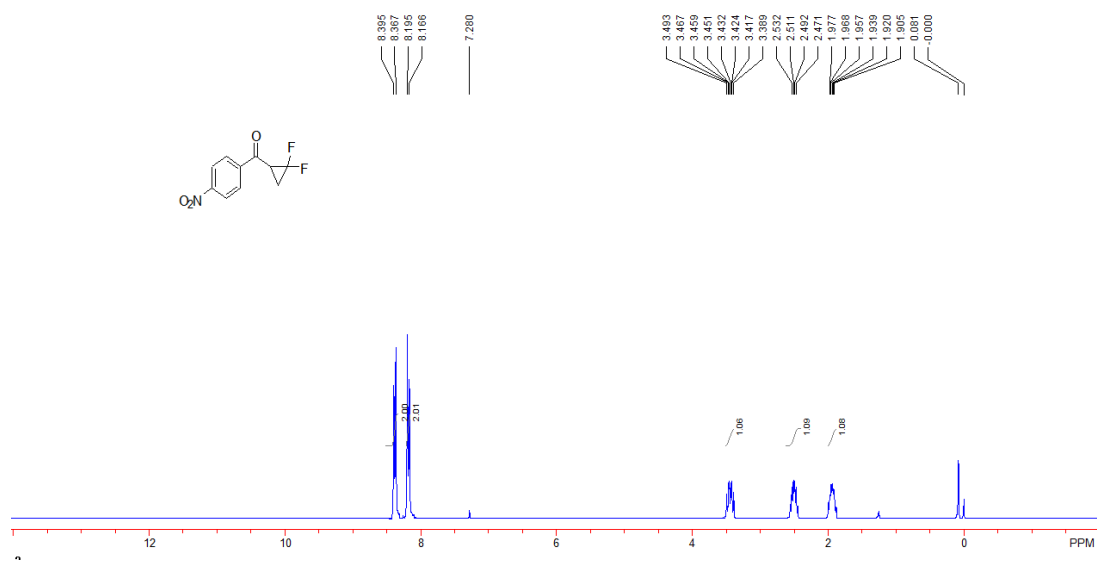

### $^{19}\text{F}$ NMR of **1g**

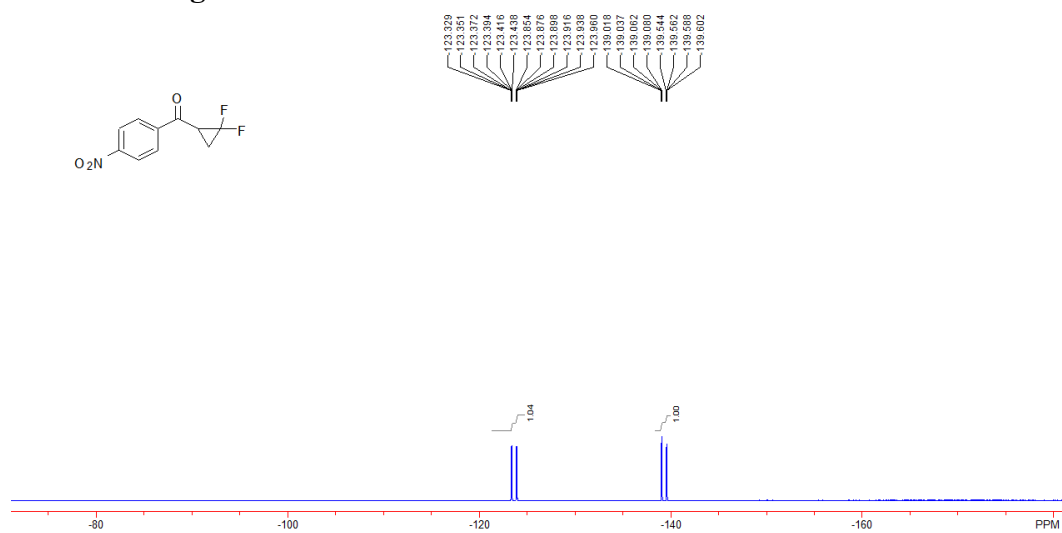

### $^{13}\text{C}$ NMR of **1g**

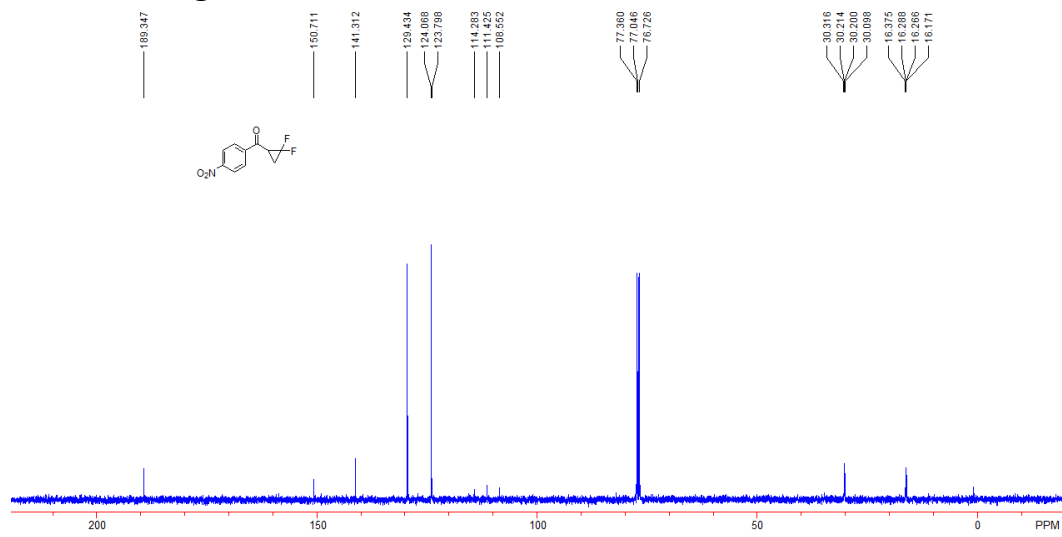

### $^1\text{H}$ NMR of **1i**

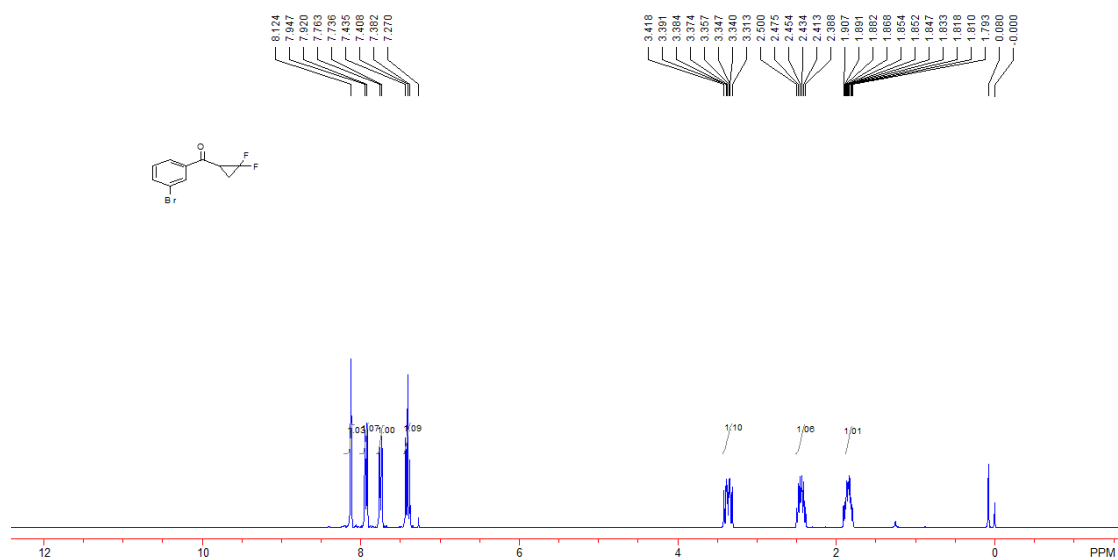

### $^{19}\text{F}$ NMR of **1i**

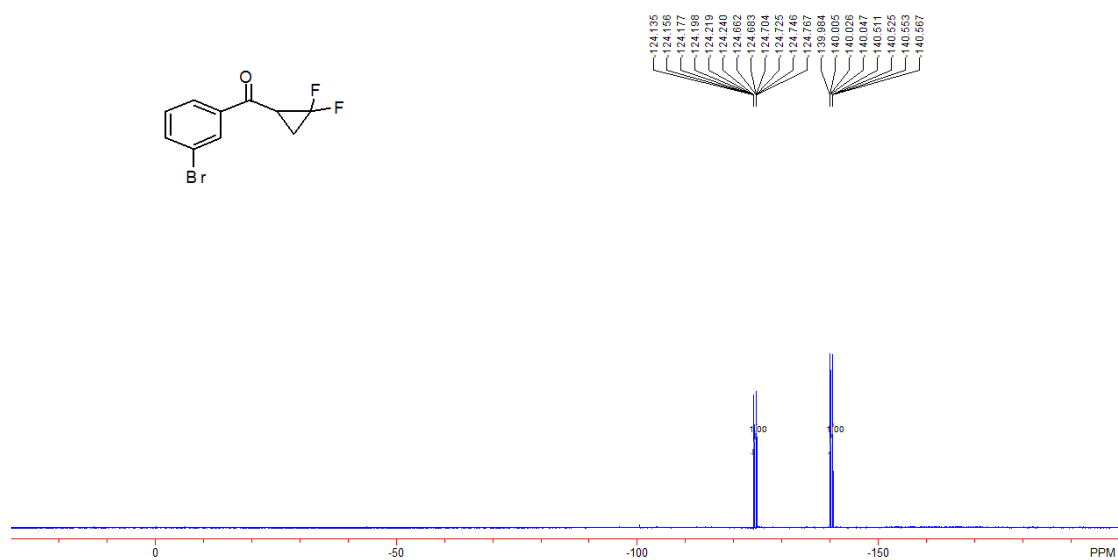

### $^{13}\text{C}$ NMR of **1i**

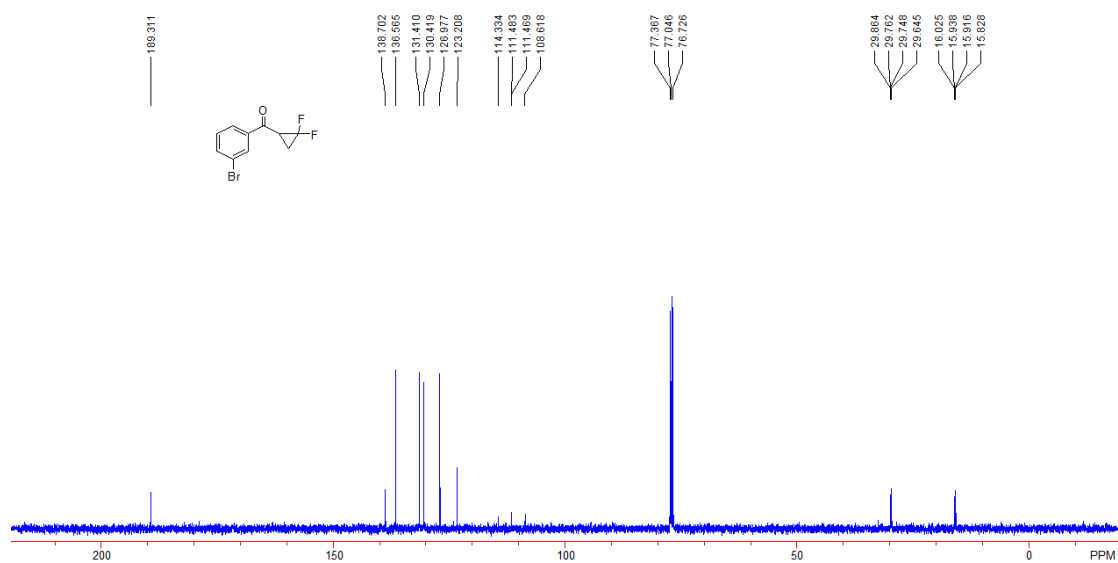

### $^1\text{H}$ NMR of **1k**

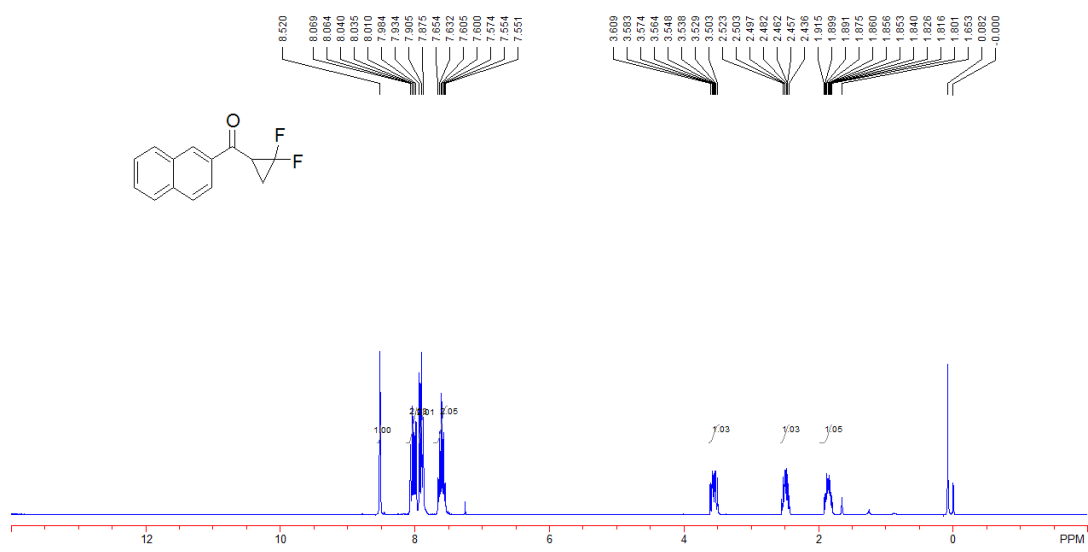

### $^{19}\text{F}$ NMR of **1k**

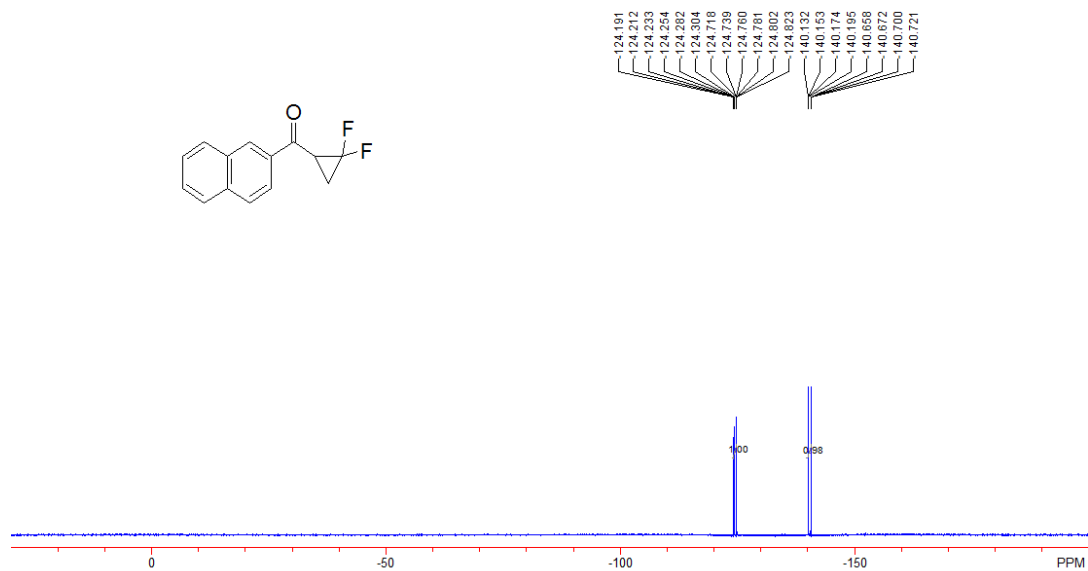

### $^{13}\text{C}$ NMR of **1k**

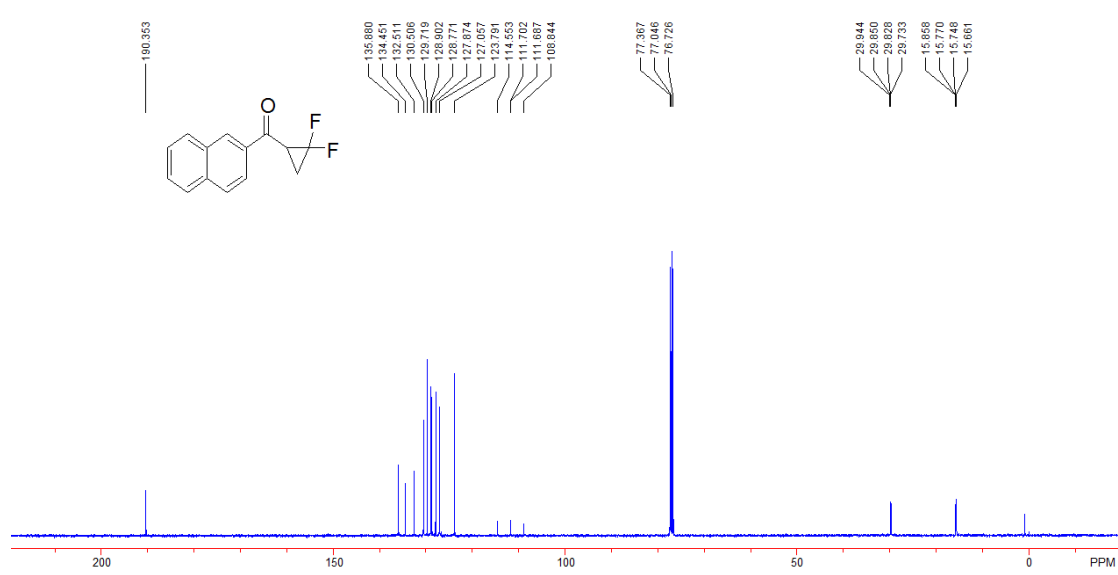



### $^1\text{H}$ NMR of **2a**

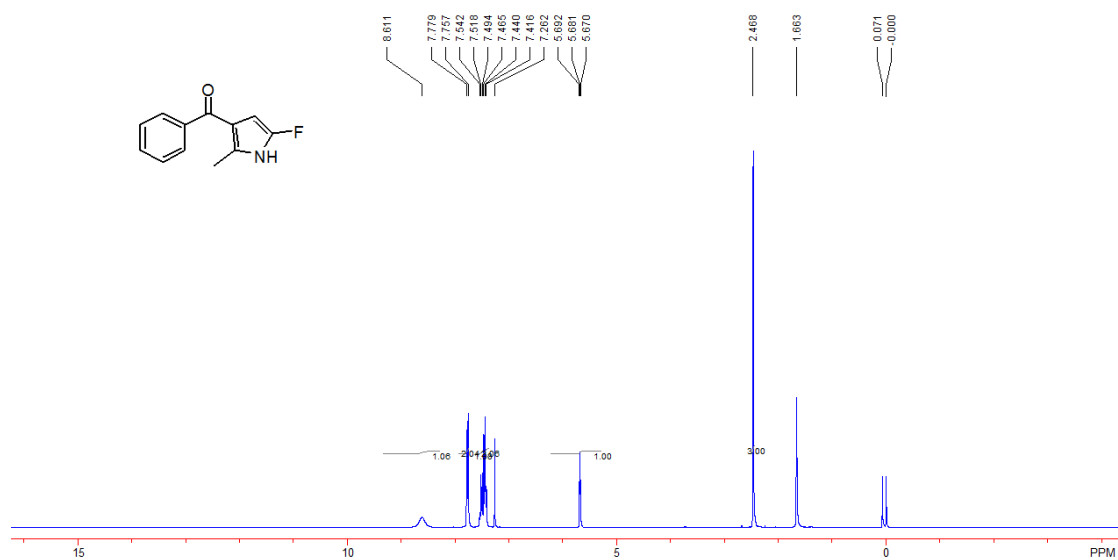

### $^{19}\text{F}$ NMR of **2a**

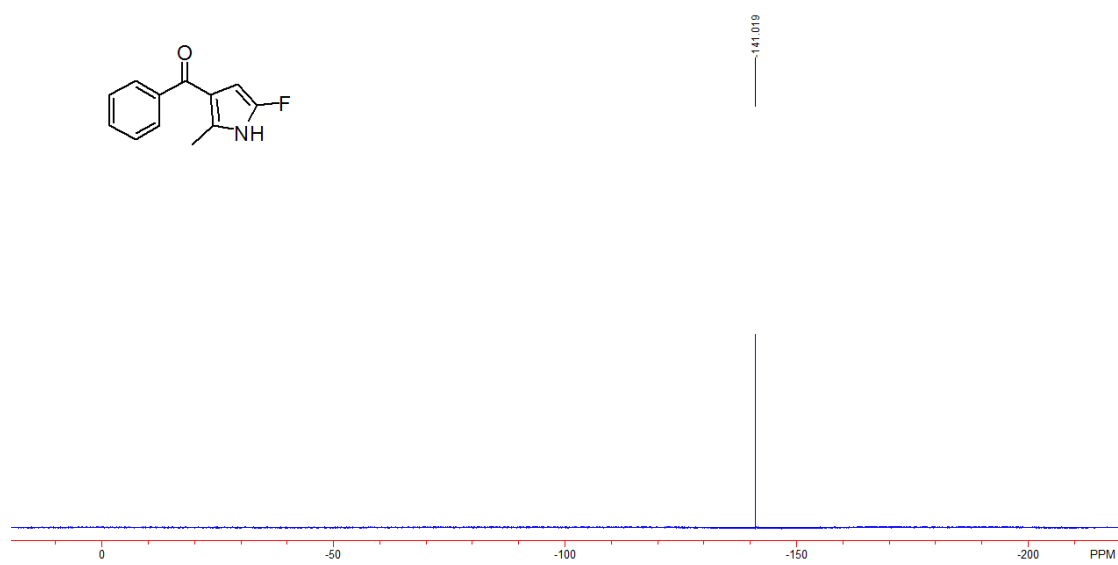

### $^{13}\text{C}$ NMR of **2a**

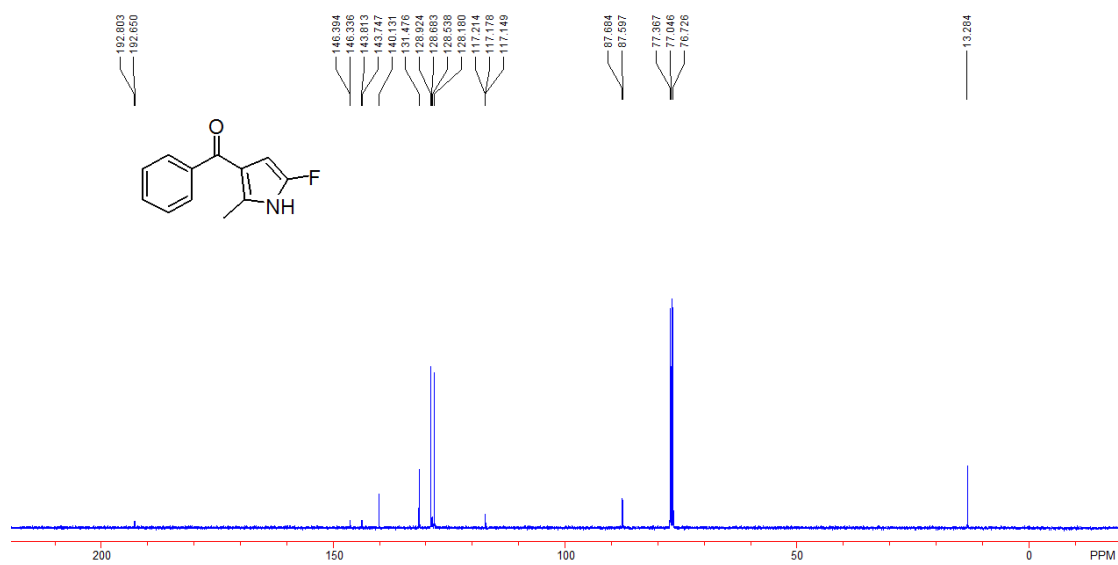

### <sup>1</sup>H NMR of **2b**

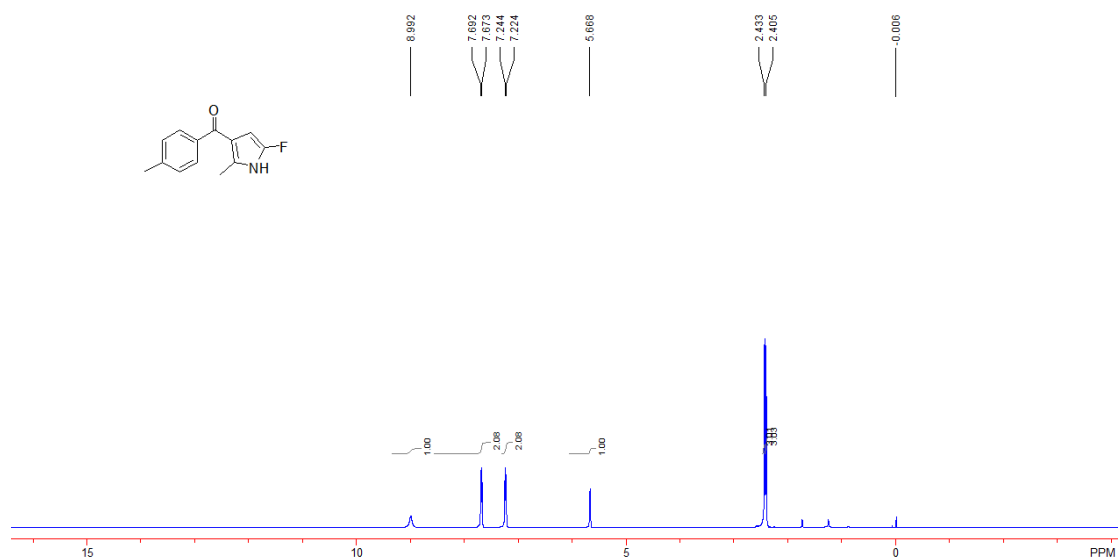

### <sup>19</sup>F NMR of **2b**

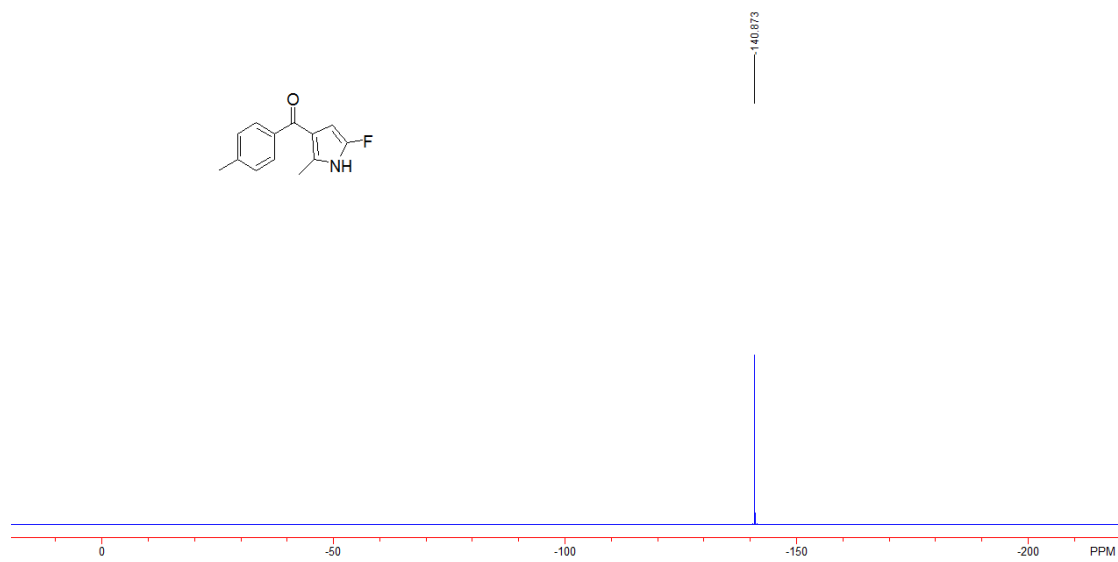

### <sup>13</sup>C NMR of **2b**

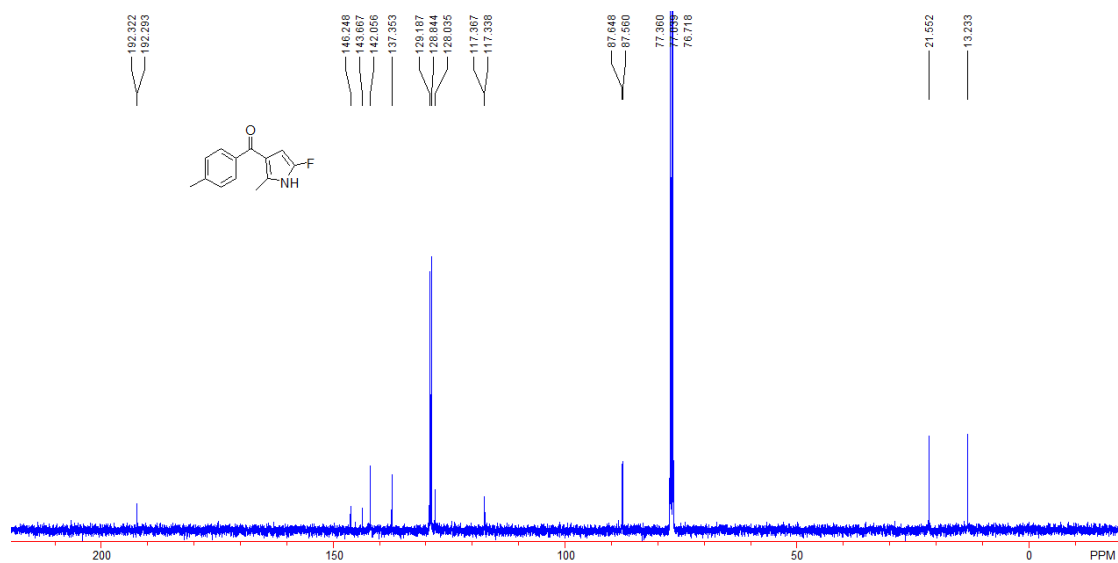

### <sup>1</sup>H NMR of **2c**

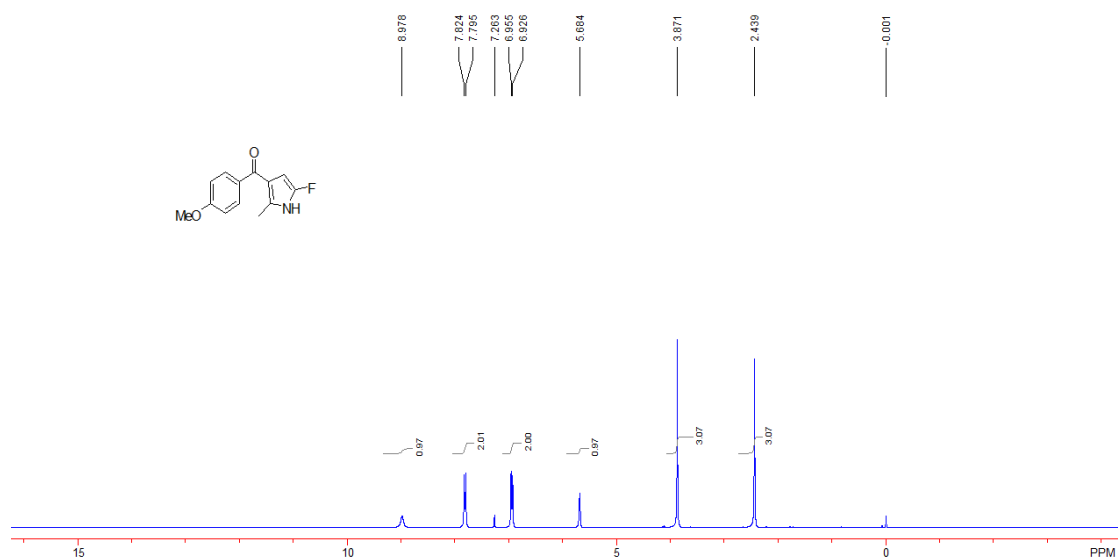

### <sup>19</sup>F NMR of **2c**

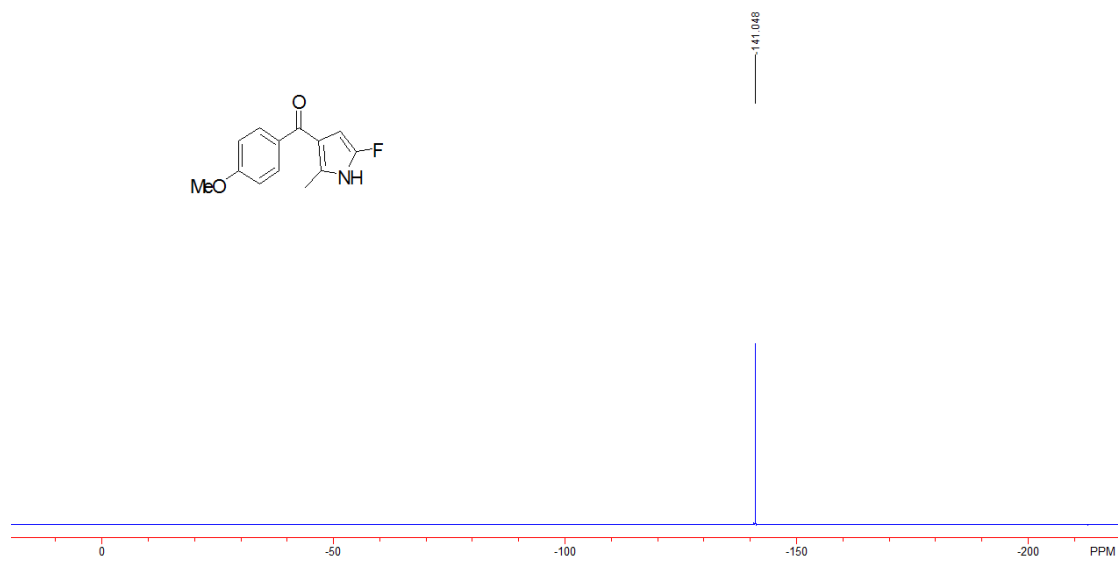

### <sup>13</sup>C NMR of **2c**

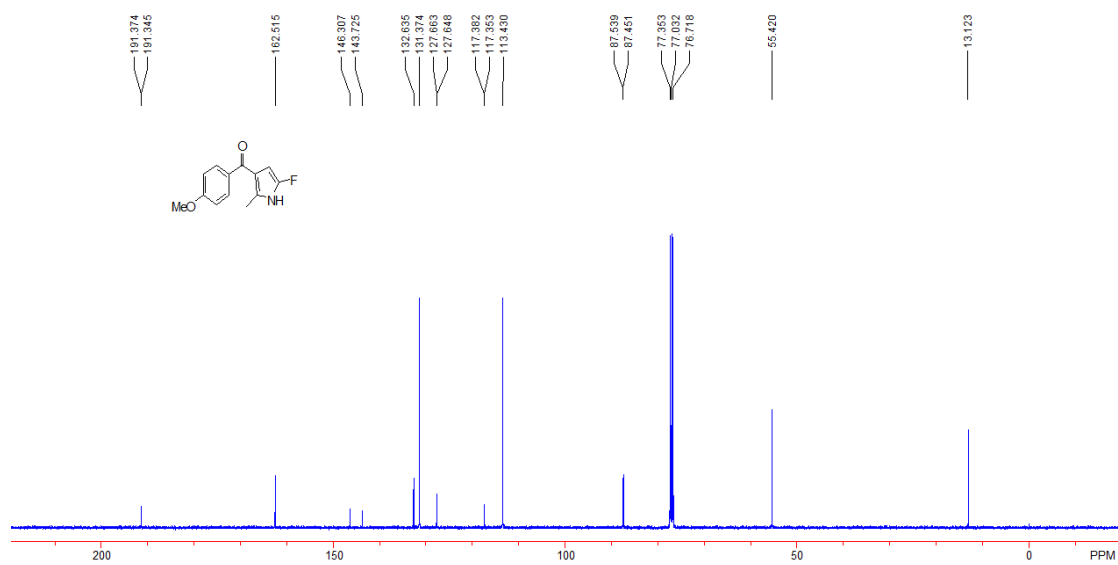

### $^1\text{H}$ NMR of **2d**

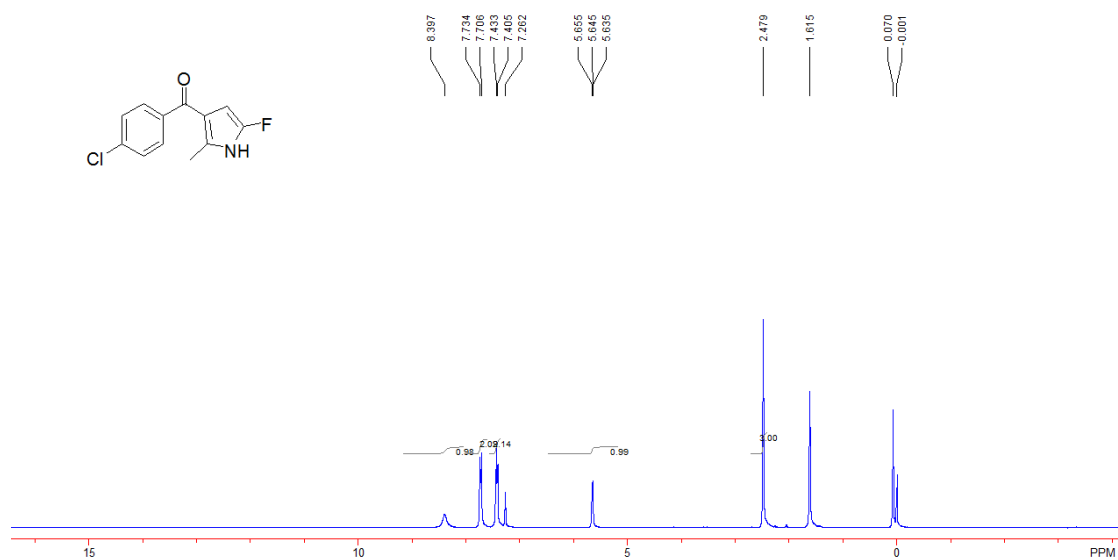

### $^{19}\text{F}$ NMR of **2d**

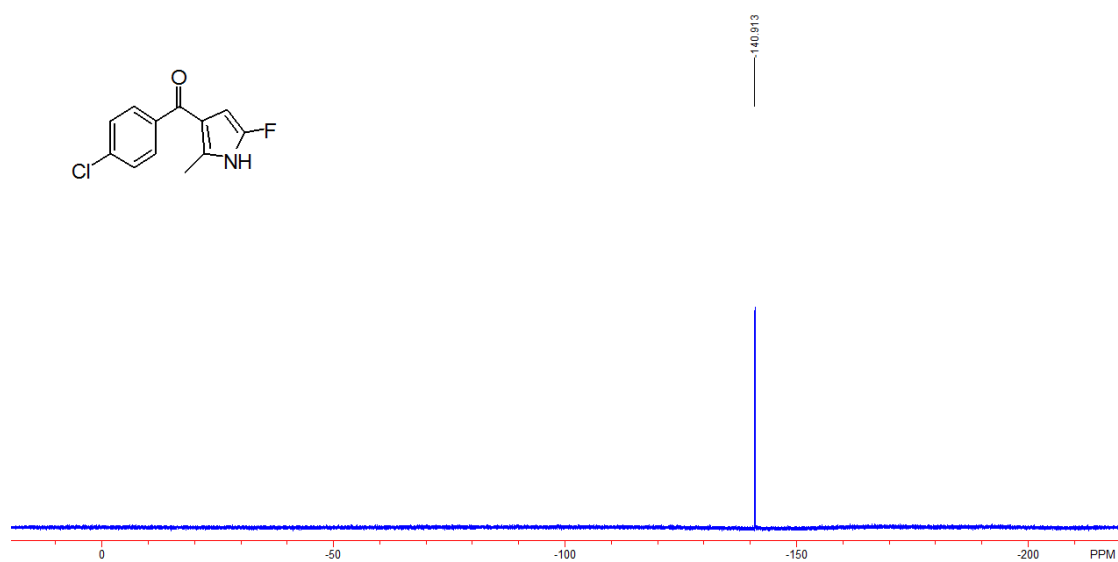

### $^{13}\text{C}$ NMR of **2d**

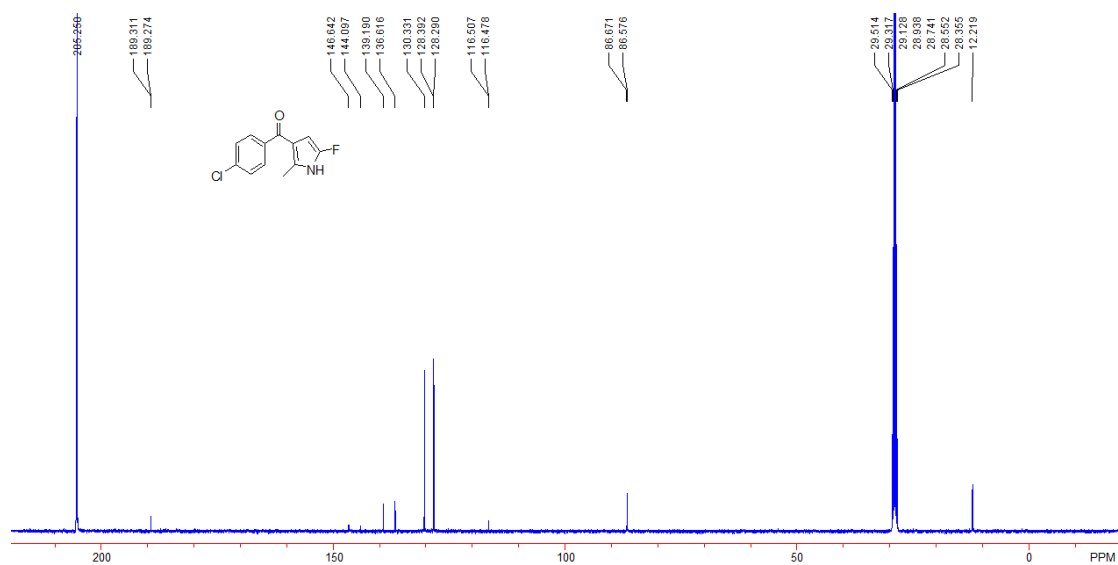

### $^1\text{H}$ NMR of **2e**

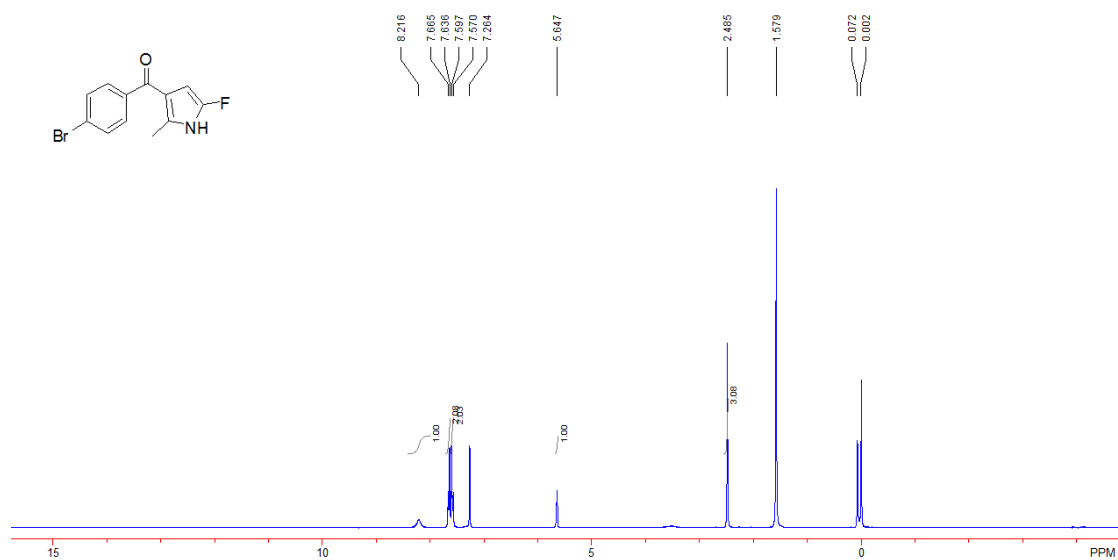

### $^{19}\text{F}$ NMR of **2e**

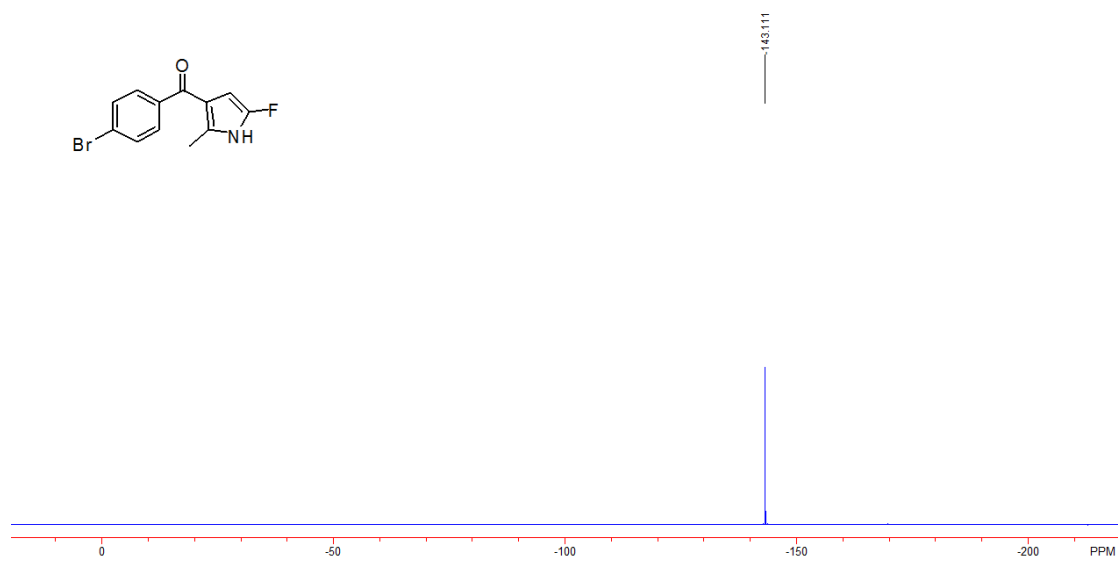

### $^{13}\text{C}$ NMR of **2e**

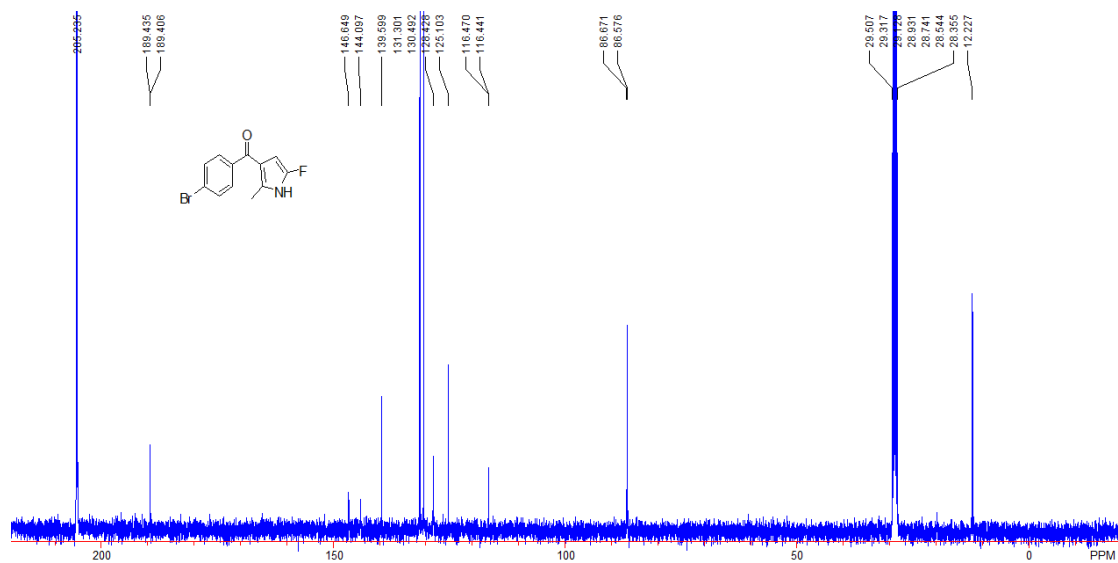

### <sup>1</sup>H NMR of **2f**

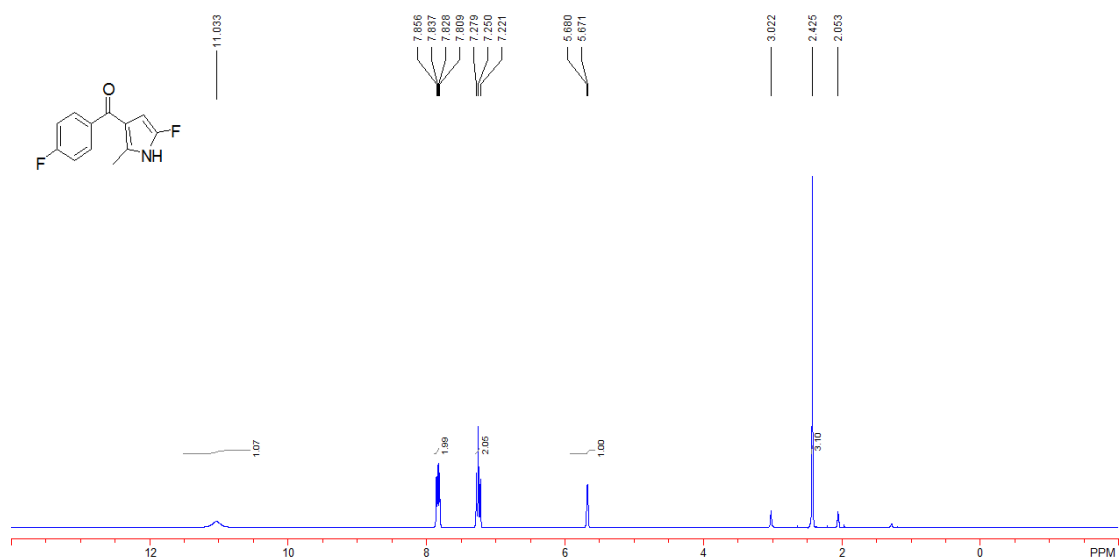

### <sup>19</sup>F NMR of **2f**

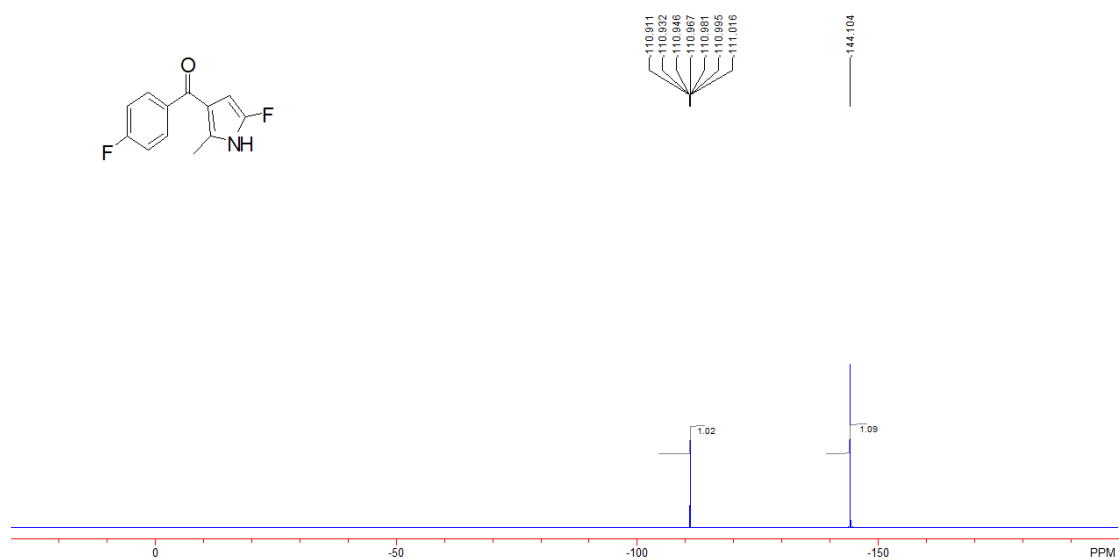

### <sup>13</sup>C NMR of **2f**

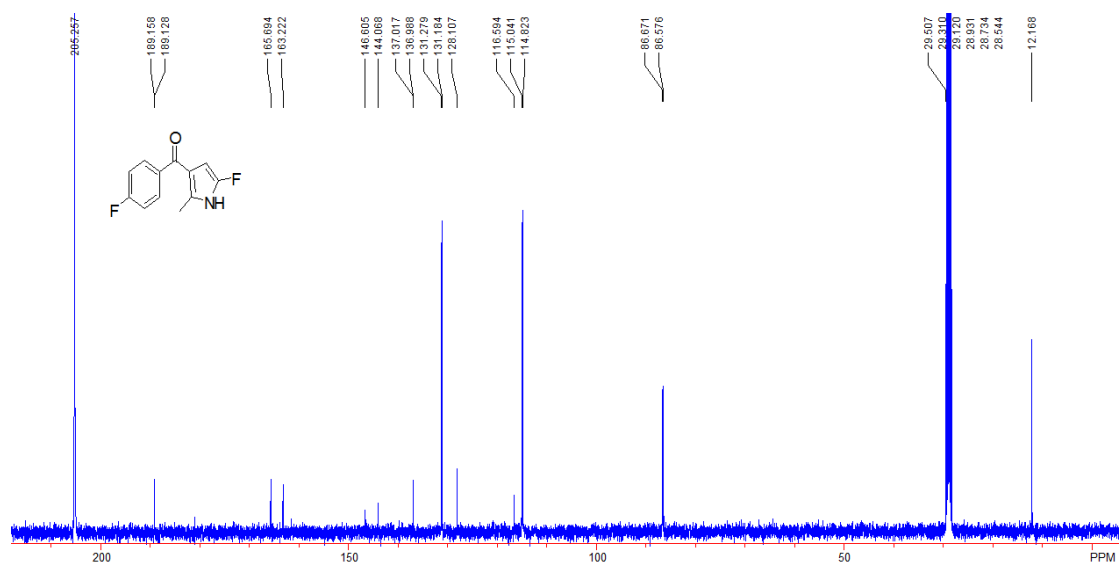

### <sup>1</sup>H NMR of **2g**

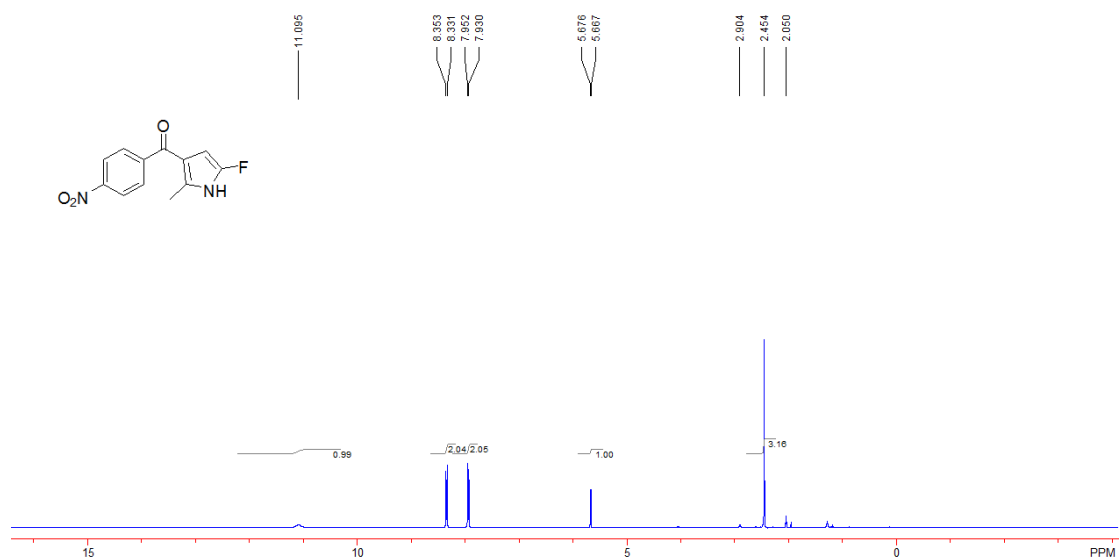

### <sup>19</sup>F NMR of **2g**

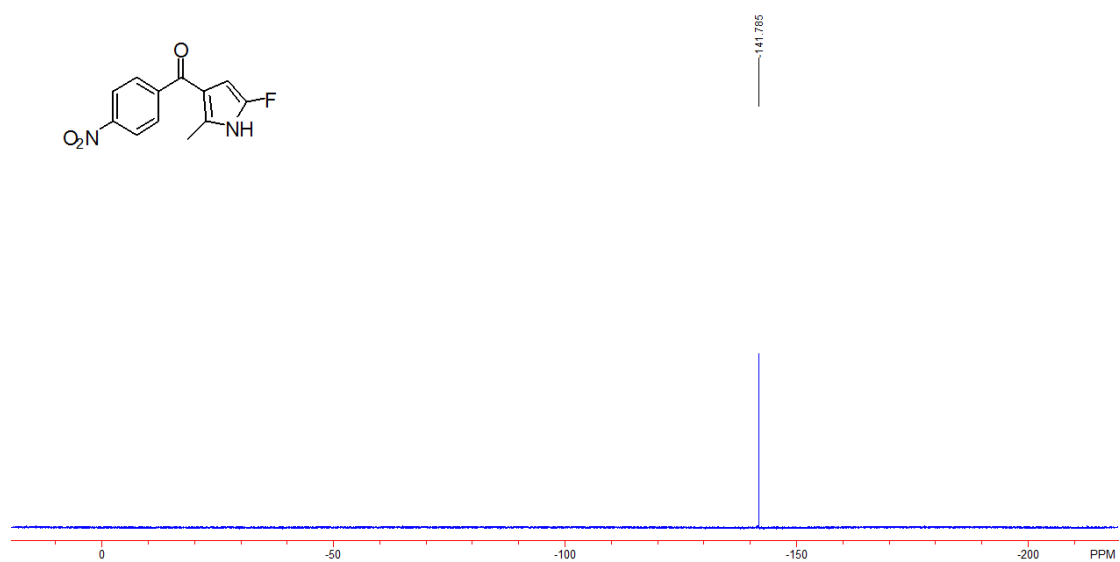

### <sup>13</sup>C NMR of **2g**

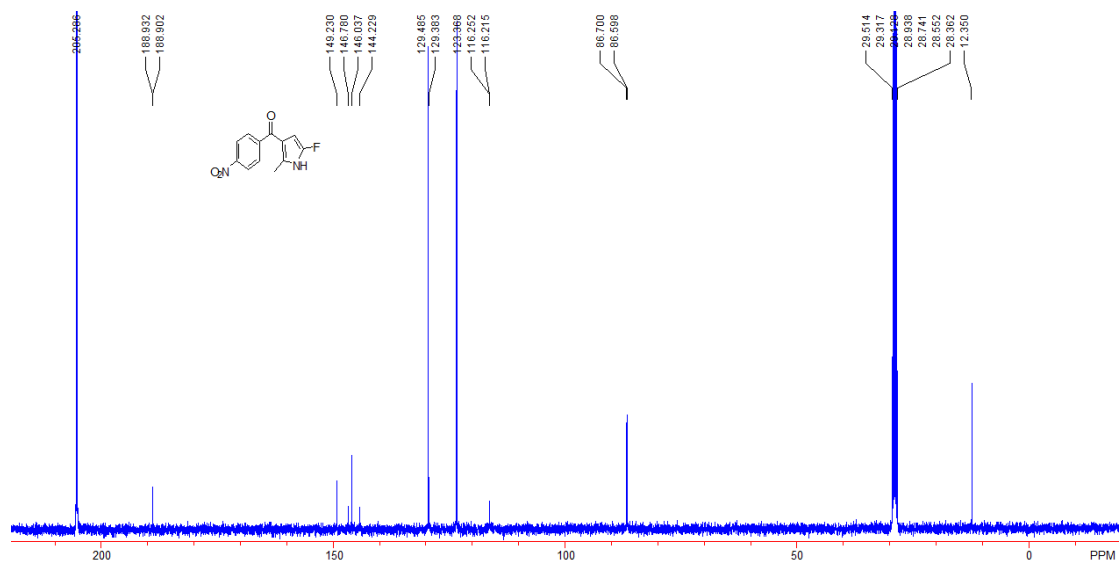

### <sup>1</sup>H NMR of **2h**

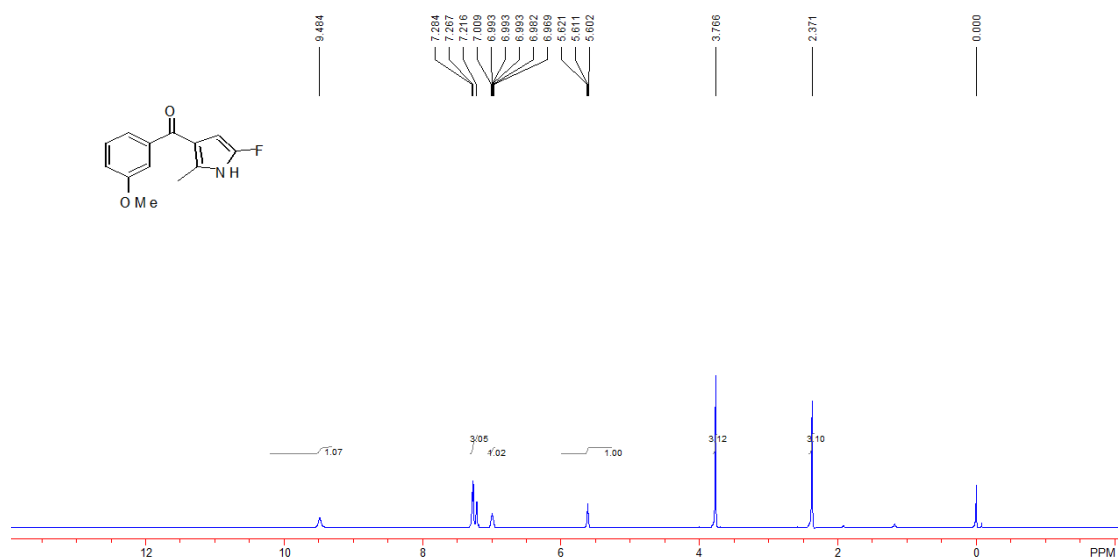

### <sup>19</sup>F NMR of **2h**

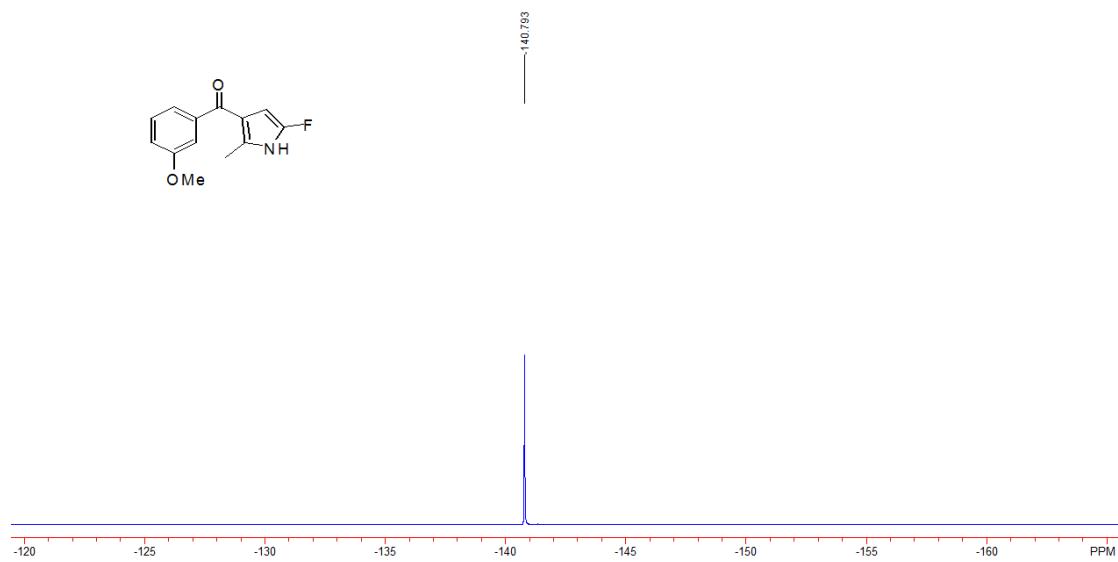

### <sup>13</sup>C NMR of **2h**

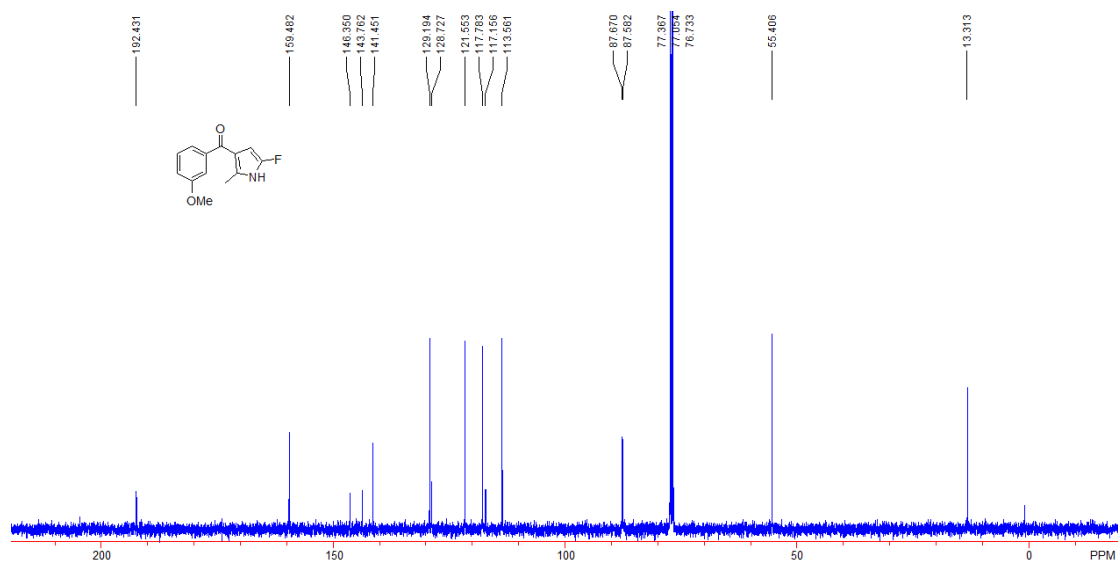



### $^1\text{H}$ NMR of **2i**

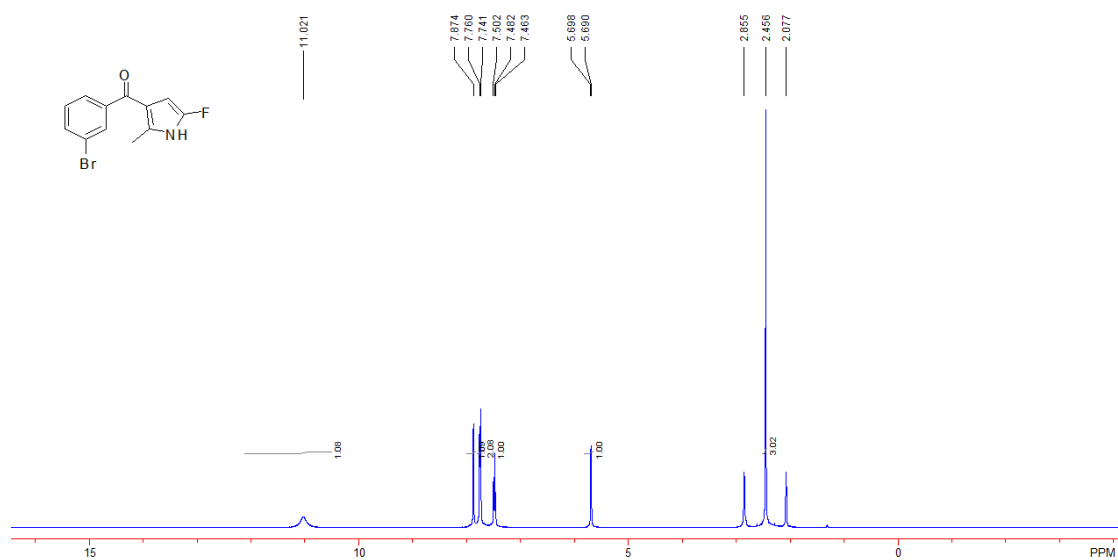

### $^{19}\text{F}$ NMR of **2i**

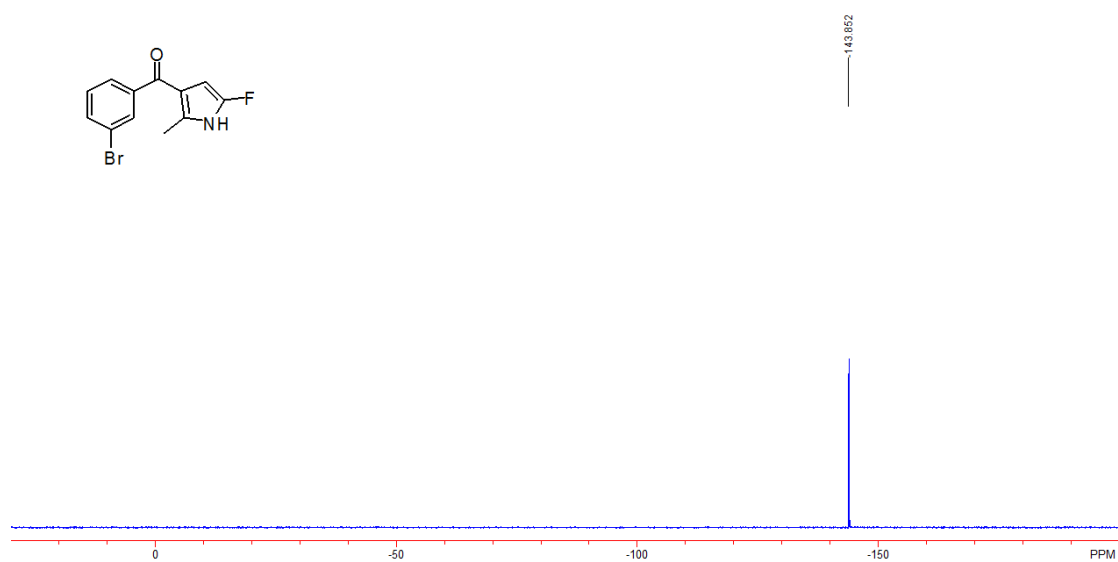

### $^{13}\text{C}$ NMR of **2i**

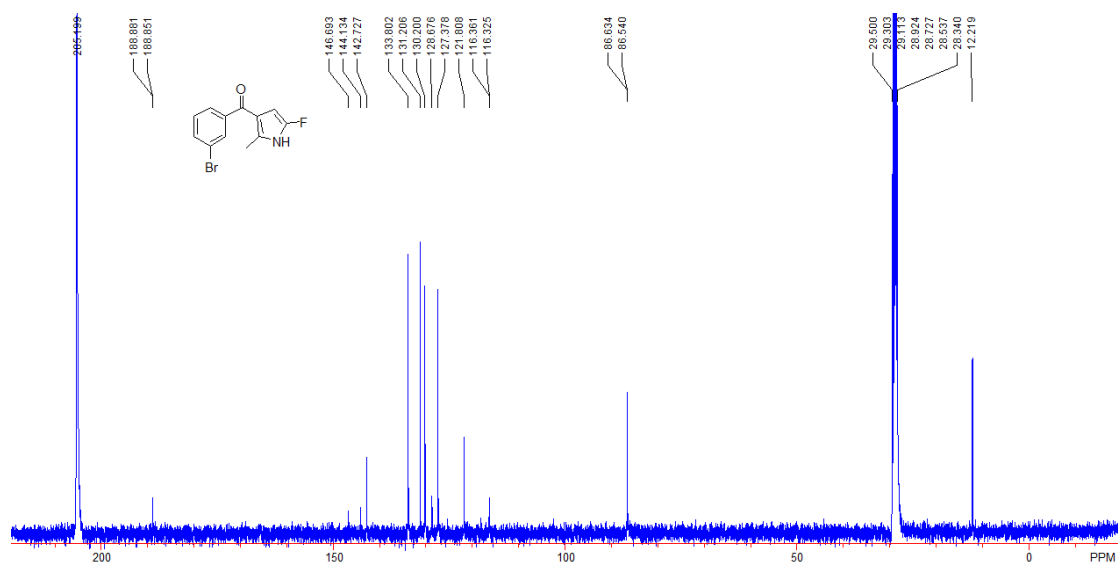

### $^1\text{H}$ NMR of **2j**

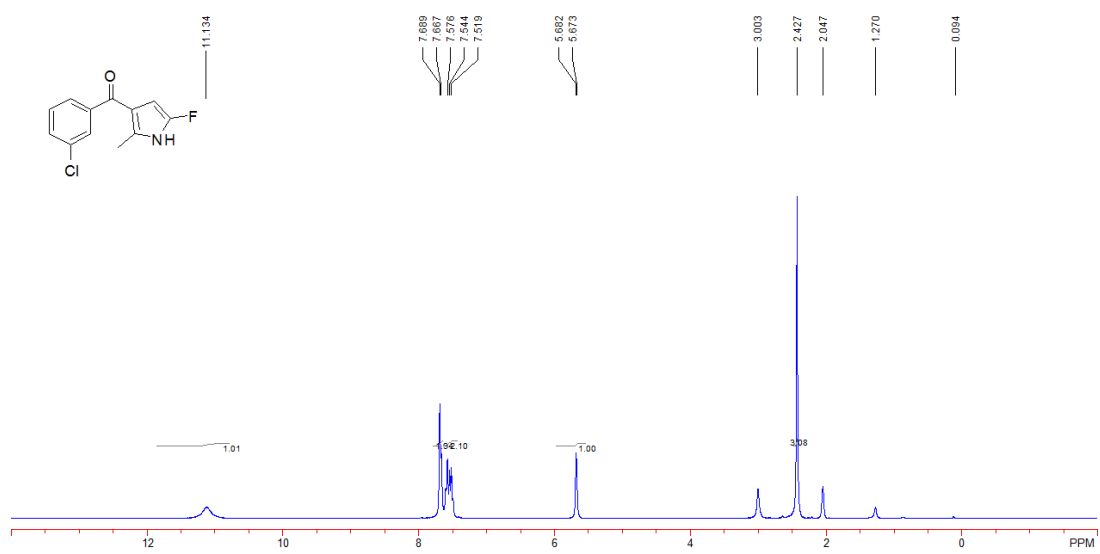

### $^{19}\text{F}$ NMR of **2j**

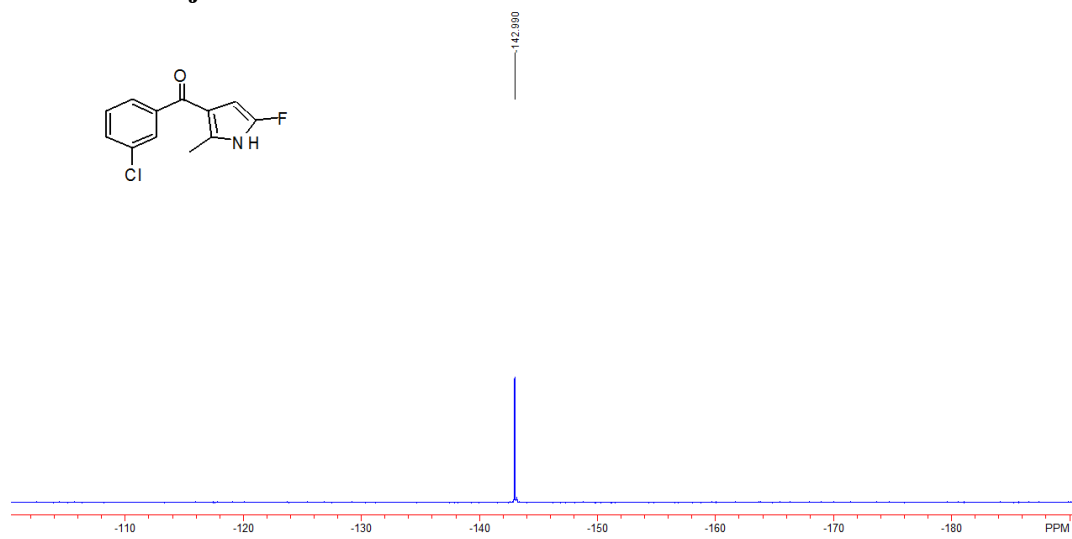

### $^{13}\text{C}$ NMR of **2j**

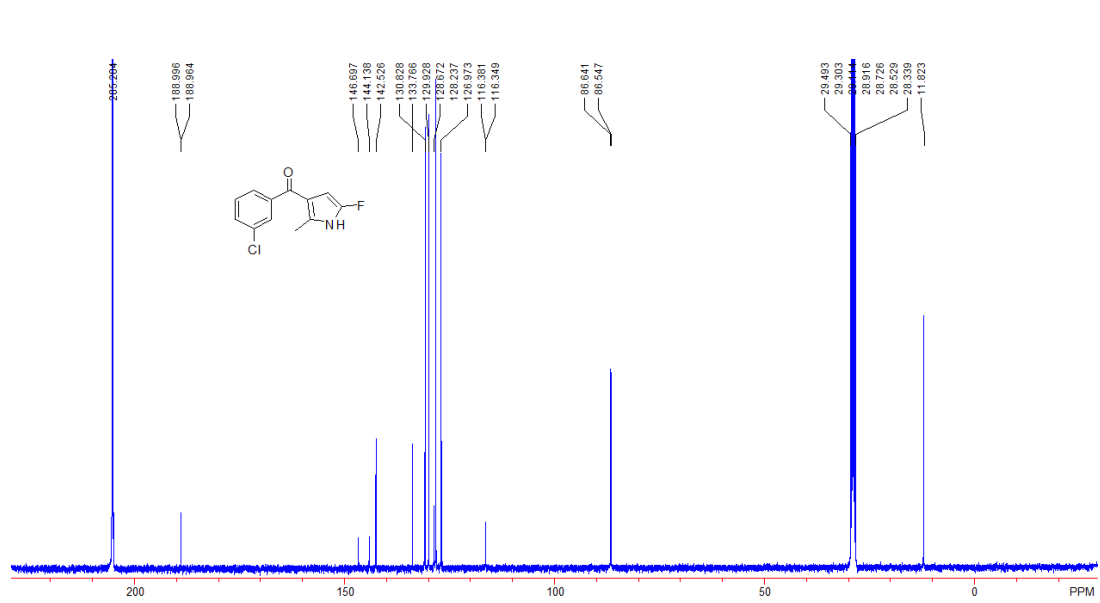

### <sup>1</sup>H NMR of 2k

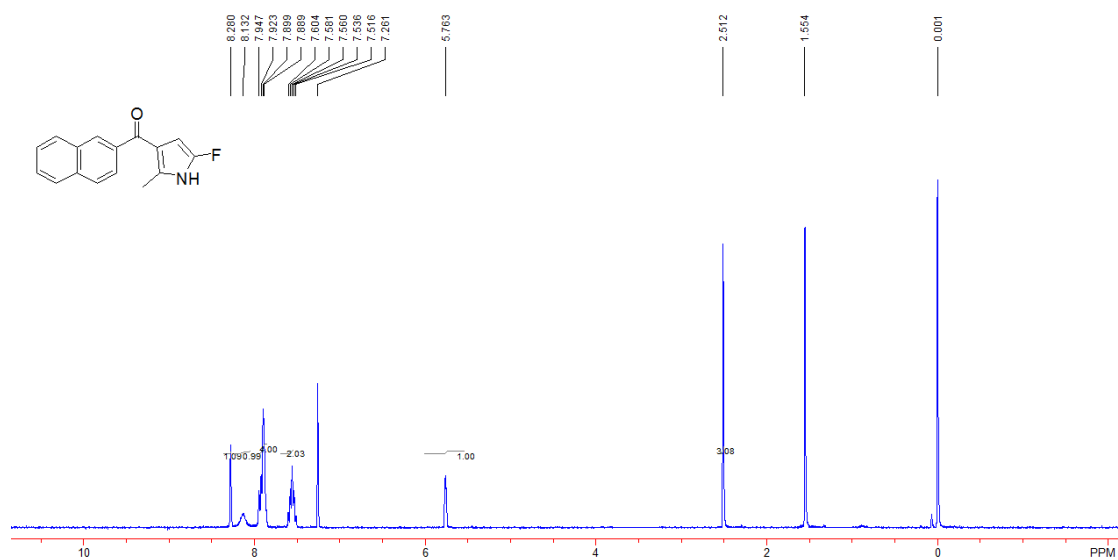

### <sup>19</sup>F NMR of 2k

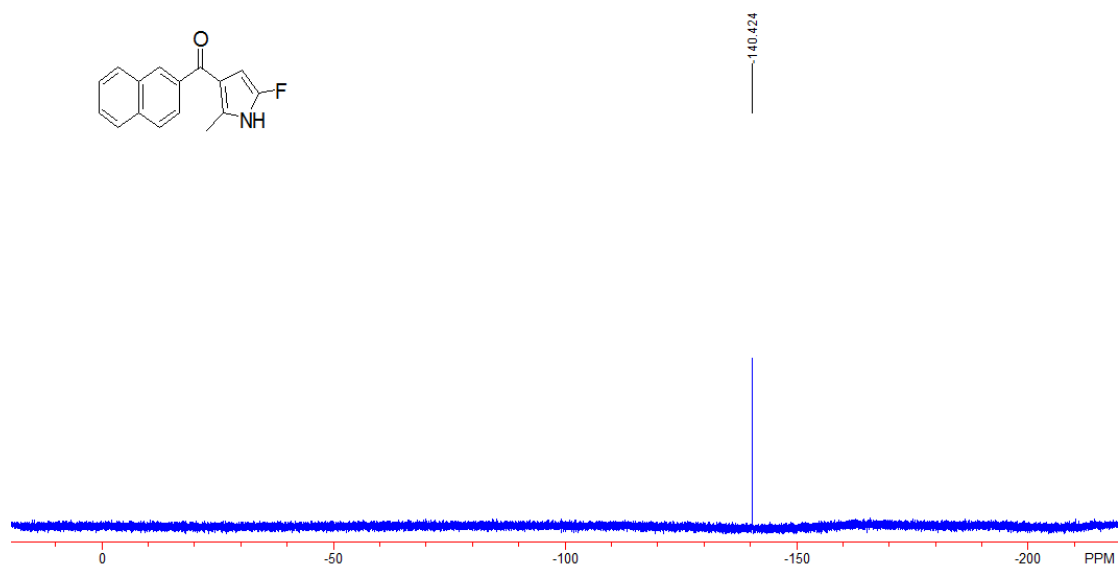

### <sup>13</sup>C NMR of 2k

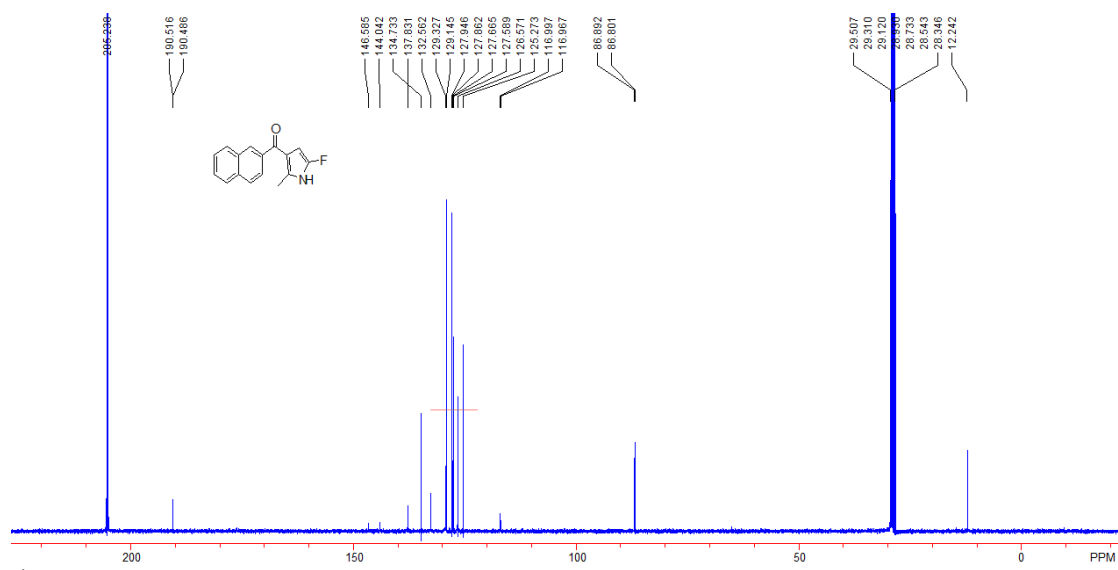

### $^1\text{H}$ NMR of **21**

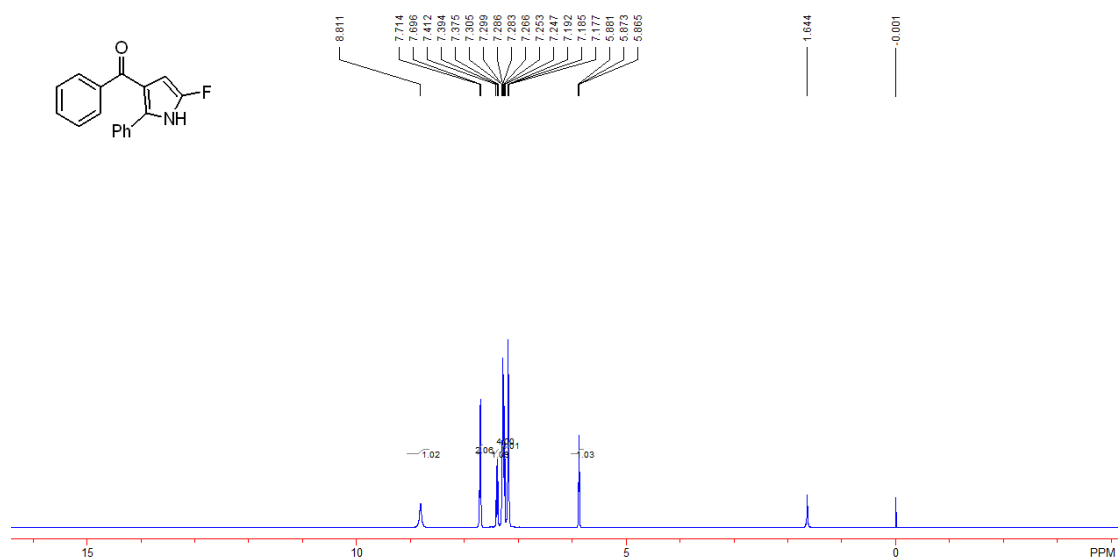

### $^{19}\text{F}$ NMR of **21**

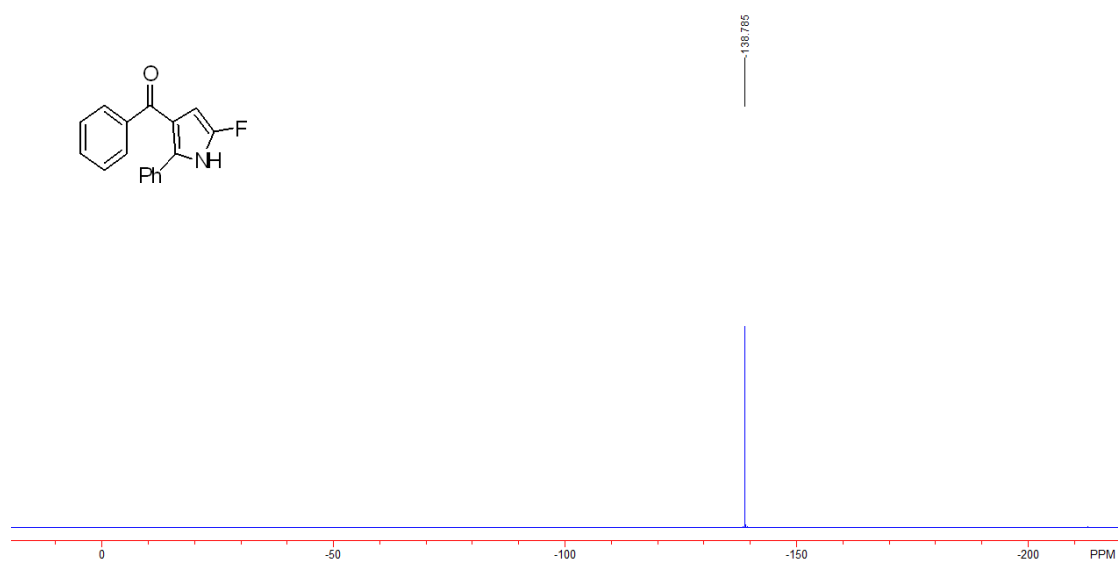

### $^{13}\text{C}$ NMR of **21**

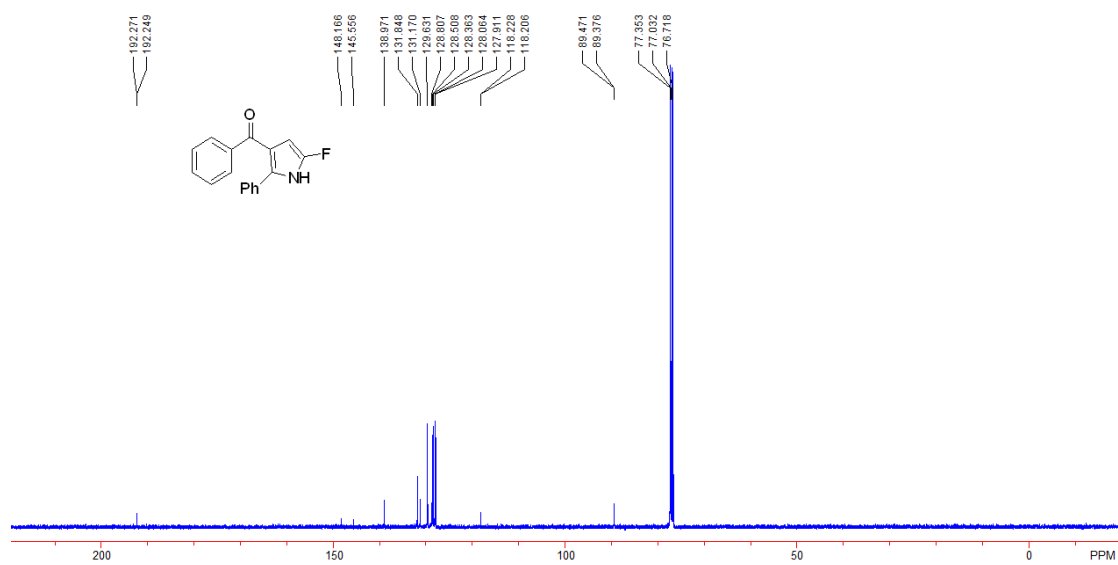

Supplement: c3cc45456h.pdf [file c3cc45456h.pdf]
